# Diversity amongst human cortical pyramidal neurons revealed via their sag currents and frequency preferences

Homeira Moradi Chameh<sup>1</sup>, Scott Rich<sup>1</sup>, Lihua Wang<sup>1</sup>, Fu-Der Chen<sup>2,3</sup>, Liang Zhang<sup>1,4</sup>, Peter L. Carlen<sup>1,4,5</sup>, Shreejoy J. Tripathy<sup>6,7,8†</sup>, Taufik A. Valiante<sup>1,2,5,7,9\*†</sup>

<sup>1</sup>Krembil Brain Institute, University Health Network, 60 Leonard Street, Toronto, ON, Canada, M5T 2S8. <sup>2</sup>Department of Electrical and Computer Engineering, University of Toronto, 10 King's College Road, Toronto, ON, Canada, M5S 3G8. <sup>3</sup>Max Planck Institute of Microstructure Physics, Weinberg 2, 06120, Halle, Germany. <sup>4</sup>Departments of Medicine & Physiology, Medical Science Building, University of Toronto, 1 King's College Circle, Toronto, ON, Canada, M5S 1A8. <sup>5</sup>Institute of Biomedical Engineering, Rosebrugh Building, University of Toronto, 164 College Street, Toronto, ON, Canada, M5S 3G9. <sup>6</sup>Krembil Centre for Neuroinformatics, Centre for Addiction and Mental Health, 250 College Street, Toronto, ON, Canada, M5T 1R8. <sup>7</sup>Institute of Medical Sciences, Medical Science Building, University of Toronto, 1 King's College Circle, Toronto, ON, Canada, M5S 1A8. <sup>8</sup>Department of Psychiatry, University of Toronto, 250 College Street, Toronto, ON, Canada, M5T 1R8. <sup>9</sup>Department of Surgery, Division of Neurosurgery, Stewart Building, University of Toronto, 149 College Street, Toronto, ON, Canada, M5T 1P5.

†These authors contributed equally.

\* [taufik.valiante@uhn.ca](mailto:taufik.valiante@uhn.ca)

## Abstract

In the human neocortex coherent interlaminar theta oscillations are driven by deep cortical layers, suggesting neurons in these layers exhibit distinct electrophysiological properties. To characterize this potential distinctiveness, we use in vitro whole-cell recordings from cortical layers 2 and 3 (L2&3), layer 3c (L3c) and layer 5 (L5) of the human cortex. Across all layers we observe notable heterogeneity, indicating human cortical pyramidal neurons are an electrophysiologically diverse population. L5 pyramidal cells are the most excitable of these neurons and exhibit the most prominent sag current (abolished by blockade of the hyperpolarization activated cation current,  $I_h$ ). While subthreshold resonance is more common in L3c and L5, we rarely observe this resonance at frequencies greater than 2Hz. However, the frequency dependent gain of L5 neurons reveals they are most adept at tracking both delta and theta frequency inputs, a unique feature that may indirectly be important for the generation of cortical theta oscillations.

## Introduction

Comparative studies between human and rodent cortical neuronal physiology have revealed unique human cortical neuronal and microcircuit properties. At the cellular level, human neurons have been shown to have unique morphological properties <sup>1</sup>, potentially reduced membrane capacitances <sup>2</sup>, increased dendritic compartmentalization in thick-tufted L5 pyramidal cells <sup>3</sup>, higher h-channel densities in L3 versus L2 pyramidal cells <sup>4</sup>, and a wholly unique neuronal cell type <sup>5,6</sup>. At the microcircuit level, human neocortical circuits demonstrate unique reverberant activity <sup>7</sup>, different spike-timing dependent plasticity (STDP) rules compared to neocortical circuits in rodents <sup>8</sup>, and coherent oscillations between superficial and deep cortical layers <sup>9</sup>. In addition, correlations between patient intelligence quotient (IQ) and cellular features of human layer 2, 3 and 4 pyramidal cells have been demonstrated in both action potential kinetics and the length and complexity of dendritic arbors <sup>10</sup>.

44 Although understanding the unique biophysical and synaptic properties of neurons experimentally  
45 remains an important endeavor, computational models and mathematical formulations of neurons and  
46 circuits are essential for describing and explaining mesoscopic level collective dynamics such as oscillations  
47 <sup>11-13</sup>. Indeed, it has been recently posited that “a set of brain simulators based on neuron models at different  
48 levels of biological detail” are needed in order to “allow for systematic refinement of candidate network  
49 models by comparison with experiments”<sup>14</sup>. By extension, to create simulations of the human brain and  
50 cortical microcircuit, we need neuronal models derived from direct human experiments. Thus, as we  
51 explore what is uniquely human about the human brain in order to, for example, tackle the increasing  
52 societal burden of neurological and neuropsychiatric conditions <sup>15,16</sup>, infusing computational models with  
53 human derived micro- and mesoscopic cellular and circuit properties will be critically important.

54 In this context, our previous experiments in human cortical slices have demonstrated that spontaneous  
55 theta-like activity, the most ubiquitous oscillation in the human brain <sup>17</sup> can be induced by application of  
56 cholinergic and glutamatergic agonists <sup>9</sup>. We observed theta oscillations that were coherent between  
57 cortical laminae, with the deep layer leading in phase relative to the superficial layer <sup>9</sup>. We also observed  
58 robust cross-frequency coupling between theta and high-gamma activity that was modulated with the  
59 strength of synchrony between cortical laminae <sup>18</sup>– “so called coordination though coherent phase–  
60 amplitude coupling”<sup>19</sup>. Given the role of intrinsic electrophysiological properties in the generation of  
61 oscillations <sup>20</sup> and the finding that deep layer theta leads superficial layer theta in phase, we reasoned that  
62 deep layer neurons in the human neocortex are likely endowed with distinct biophysical properties that  
63 enable them to “drive” such interlaminar activity.

64 One of the candidate membrane currents thought to contribute to low-frequency (<8Hz) oscillations is  
65 the hyperpolarization activated cation current or h-current ( $I_h$ ) <sup>3,4,21,22</sup>. This current is important for  
66 oscillations and pacemaking activity in a myriad of cell types, ranging from midbrain and hippocampal  
67 neurons to cardiac pacemaker neurons <sup>23-25</sup>. Consistent with its role in contributing to resonant activity, a  
68 recent study in the human neocortex demonstrated that  $I_h$  appeared necessary for the subthreshold  
69 resonance observed in L3 neurons <sup>4</sup>. In addition, it has been reported that thick-tufted neurons in L5 of the  
70 human neocortex also display prominent somatic and dendritic  $I_h$  and subthreshold resonance <sup>3</sup>. However,  
71 recent transcriptomic evidence and detailed comparisons to homologous cells in rodents <sup>26</sup> have suggested  
72 that these thick-tufted, extra-telencephalic (ET) neurons are much rarer, implying our understanding of the  
73 electrophysiological properties of L5 pyramidal neurons remains incomplete.

74 Based on our previous findings that deep layer activity appears to drive superficial activity in the human  
75 cortex <sup>9</sup>, we hypothesized that this “leading” role in generating interlaminar coherence can be attributed  
76 in part to the differing intrinsic properties of deep layer from superficial layer neurons. In pursuit of this  
77 hypothesis, we sought to gain a more complete understanding of the features of human L5 cortical  
78 pyramidal neurons. We used whole-cell recordings to characterize pyramidal cells in L2&3, L3c, and L5,  
79 focusing on the amplitude and kinetics of  $I_h$  via the sag voltage. In addition to key biophysical differences  
80 favoring greater excitability in human L5 versus L2&3 pyramidal cells, we found that L5 and L3c  
81 demonstrated larger sag voltage amplitudes relative to L2&3 pyramidal cells generally. Somewhat  
82 surprisingly, while some subthreshold resonance at >2Hz was observed in our experiments, we found this  
83 feature to be generally quite rare amongst pyramidal cells across all layers. However, we did find that L5  
84 pyramidal cells showed enhanced frequency dependent gain at delta and theta frequencies, which  
85 motivates our presentation of a “dynamic circuit motif” <sup>20</sup> underlying how L5 neurons “drive” human  
86 cortical theta. Lastly, we found notable cell-to-cell variability in electrophysiological parameters sampled  
87 from pyramidal cells recorded within the same lamina consistent with previous studies in human L2&3  
88 <sup>4,27,28</sup>, and further reveal that this variability is especially large in L5.

89 Table 1: Demographic data (for a subset of 49 patients where such information was available)

| Age (Years) | Sex | Years of seizure history | Diagnosis | Antiepileptic drugs     | Resection location  |
|-------------|-----|--------------------------|-----------|-------------------------|---------------------|
| 39          | F   | 11                       | Tumor     | LSC, LRZ, LEV           | Right-ATL           |
| 58          | F   | 8                        | Tumor     | CBZ                     | Left-FL             |
| 57          | M   | 45                       | Epilepsy  | LSC, CZP, CBZ           | Right-ATL           |
| 27          | M   | 11                       | Epilepsy  | LSC, LRZ, CLB           | Right-ATL           |
| 24          | M   | 8                        | Epilepsy  | LEV, LTG                | Right-ATL           |
| 25          | M   | 12                       | Epilepsy  | CBZ, LSC                | Right-ATL           |
| 33          | F   | 4                        | Epilepsy  | LEV                     | Left-FL             |
| 33          | M   | 14                       | Epilepsy  | PHN, LEV                | Right-FL            |
| 22          | M   | 6                        | Epilepsy  | PHN, CBZ, LTG           | Left-ATL            |
| 21          | M   | 2                        | Epilepsy  | DR, CLB, MJ             | Left Parietal lobe  |
| 22          | M   | 12                       | Epilepsy  | PHN, LRZ                | Right-ATL           |
| 23          | F   | 23                       | Epilepsy  | CBZ, LEV, LSC           | Right-FL            |
| 53          | F   | 43                       | Epilepsy  | CBZ, LSC, LEV           | Left-ATL            |
| 37          | F   | 2                        | Tumor     | GPN, LSC, LEV, CLB, LRZ | Right-FL            |
| 47          | F   | 4                        | Epilepsy  | CBZ, CLB                | Left-ATL            |
| 52          | M   | 13                       | Epilepsy  | CBZ, CLB                | Left-ATL            |
| 50          | F   | 26                       | Epilepsy  | PHN, LTG                | Right-ATL           |
| 36          | F   | 34                       | Epilepsy  | LSC, CBZ                | Left-ATL            |
| 40          | M   | 29                       | Epilepsy  | LEV                     | Right-ATL           |
| 25          | F   | 10                       | Epilepsy  | CBZ, LSC, LEV           | Right-ATL           |
| 52          | M   | 27                       | Epilepsy  | LSC, LRZ                | Left-ATL            |
| 21          | M   | 11                       | Epilepsy  | LTG, CBZ                | Left-ATL            |
| 63          | M   | 0.1                      | Tumor     | PHN                     | Right-Parietal lobe |
| 42          | M   | 22                       | Epilepsy  | CBZ                     | Right-FL            |
| 25          | F   | 22                       | Epilepsy  | LSC, CLB, LTG           | Right-FL            |
| 24          | F   | 3                        | Tumor     | LEV                     | Left-ATL            |
| 53          | M   | 9                        | Epilepsy  | LEV                     | Left-ATL            |
| 45          | F   | 20                       | Epilepsy  | LTG                     | Right-ATL           |
| 26          | F   | 25                       | Epilepsy  | CBZ, CLB, LTG           | Right-ATL           |
| 35          | F   | 14                       | Epilepsy  | LRZ, DR, PHN            | Left-ATL            |
| 24          | M   | 6                        | Epilepsy  | LSC, LRZ, MJ            | Right-ATL           |
| 53          | F   | 51                       | Epilepsy  | LSC, CLB                | Left-ATL            |
| 44          | F   | 3                        | Epilepsy  | LTG                     | Left-ATL            |
| 25          | M   | 14                       | Epilepsy  | CBZ                     | Right-ATL           |
| 19          | F   | 15                       | Epilepsy  | PB, CLB, GPN, RFM       | Right-ATL           |
| 30          | M   | 12                       | Epilepsy  | PHN                     | Left-ATL            |
| 26          | M   | 5                        | Epilepsy  | CBZ, DR                 | Right-ATL           |
| 28          | M   | 13                       | Epilepsy  | CLB, MJ                 | Left-ATL            |
| 52          | F   | 6                        | Epilepsy  | LTG, LEF                | Left-ATL            |
| 26          | F   | 9                        | Epilepsy  | ESL, TMP, CLB           | Right-ATL           |
| 59          | F   | 39                       | Epilepsy  | CLB, LSC                | Right-ATL           |
| 37          | M   | 5                        | Epilepsy  | CLB, LSC                | Right-ATL           |
| 55          | M   | 27                       | Epilepsy  | CLB, ESL, LTG           | Left-ATL            |
| 42          | F   | 3                        | Epilepsy  | CBZ, GPN                | Right-ATL           |
| 57          | F   | 56                       | Epilepsy  | CLB, LTG, PRM, CBD oil  | Left-ATL            |
| 24          | M   | 4                        | Epilepsy  | LEV, LTG                | Left ATL            |
| 33          | M   | 6                        | Epilepsy  | LSC, PGBPHN             | Right-ATL           |
| 39          | M   | 12                       | Epilepsy  | CLB, LTG, MJ            | Left-ATL            |
| 36          | F   | 16                       | Epilepsy  | LSC, PGB, PHN           | Right-ATL           |

90

91 CBZ, Carbamazepine; CLB, Clobazam; CZP, Clonazepam; DR, Divalproex; GPN, Gabapentin; LEV, Levetiracetam; LRZ, Lorazepam; LSC,  
 92 Lacosamide; LTG, Lamotrigine; MJ, Marijuana; PB, Phenobarbital; PHN, Phenytoin; RFM, Rufinamide; LEF, Leflunomide; ESL,  
 93 Eslicarbazepine Acetate; TMP, Tetramethylpyrazine; PRM, primidone; CBD, cannabidiol; PGB, Pregabalin; FL, Frontal lobe.

94

## 95 Results

96 Whole-cell patch clamp recordings were obtained from human neocortical neurons located in L2&3,  
97 L3c and L5 within acute brain slices collected from 61 patients. Tissues were obtained primarily from  
98 patients who underwent resective surgery for pharmacologically intractable epilepsy (see Table 1 for a  
99 summary of patient details). For many of our recordings, we did not annotate our L2&3 pyramidal cells as  
100 specifically belonging to either L2 or L3 considering the majority of these data were collected prior to  
101 publication of a recent paper illustrating divergent electrophysiological and morphological features of these  
102 neurons in the human neocortex<sup>4</sup>. Consequently, we later recorded from a targeted set of pyramidal cells  
103 in L3c (i.e., the deepest part of L3) to specifically contrast and compare our findings with those from  
104 previous findings<sup>4</sup>.

### 105 Diverse morphologies and passive membrane properties of pyramidal cells in L2&3, L3c and L5

106 To confirm the successful targeting of pyramidal cells, a subset of neurons were filled with biocytin and  
107 underwent subsequent morphological reconstruction. Figure 1a shows example electrophysiological  
108 sweeps of L2&3, L3c and L5 pyramidal cells with corresponding 3D morphological reconstructions.

109 The 3D reconstructions revealed a rich diversity of human pyramidal cell morphologies, consistent with  
110 recent detailed demonstrations of the distinct cellular morphologies of human cortical neurons as a  
111 function of cortical lamina<sup>1,3,4,27</sup>. Pyramidal cells with somas located in L2 and the upper part of L3 had  
112 complex basal dendrites, with apical dendrites often reaching L1. Pyramidal cells located in L3c showed  
113 different morphologies, with one cell (cell d) showing simple basal dendrites and another (cell e) showing  
114 much more complex basal dendrites, consistent with recent reports on the heterogeneity of pyramidal cells  
115 in L3<sup>27</sup>. Lastly, we observed two L5 neurons with very different morphologies: one cell (cell f) displays a  
116 simple morphology with apical dendrites terminating at the border of L3 and L4, and another, considerably  
117 larger pyramidal cell (cell g) with a highly complex basal dendrite and two apical dendrite trunks, with one  
118 trunk terminating in upper L3 and the other projecting to lower L3 prior to its abrupt termination due to  
119 slicing or optical truncation.

120 While we note that our human L5 morphologies are different from those reported by Beaulieu-Laroche  
121 et al.<sup>3</sup> that targeted rare thick-tufted L5 pyramidal cells<sup>26</sup> with tufts reaching into L1<sup>29</sup>, our cell  
122 morphologies are consistent with other previous reports that relatively few L5 neurons have dendrites  
123 extending past L3<sup>1</sup>. Additionally, given the challenge of potential dendrite truncation when preparing slices  
124 containing such large cells<sup>1</sup>, it is possible that our representative L5 morphologies in Figure 1 have been  
125 inadvertently truncated<sup>1</sup>. However, we only observed visible truncation in one branch of one cell (the  
126 largest cell, cell g) and no obvious truncation in the other cells shown in Figure 1.

127 We next assessed the passive membrane properties (i.e. resting membrane potential, input resistance  
128 and membrane time constant) of human cortical pyramidal cells in L2&3, L3c and L5 (n=56, n=15 and n=105  
129 neurons, respectively) using hyperpolarizing current steps in current-clamp mode (see Methods). We found  
130 that passive membrane properties differed significantly between pyramidal cells of L2&3, L3c and L5.  
131 Additionally, we found that L3c and L5 neurons had more depolarized resting membrane potentials relative  
132 to L2&3 neurons (L2&3:  $-68.2 \pm 5.3$  mV, L3c:  $-65.6 \pm 3.8$  mV, L5:  $-65.6 \pm 6.5$  mV; Fig. 1b), with L5 neurons  
133 being significantly more depolarized at rest compared to L2&3 neurons ( $p=0.007$ ). We also found that L5  
134 pyramidal cells showed higher input resistances relative to L2&3 and L3c neurons (L2&3:  $83 \pm 38.1$  M $\Omega$ ,  
135 L3c:  $79.4 \pm 21.4$  M $\Omega$ , L5:  $94.2 \pm 41.3$  M $\Omega$ ; Fig. 1c). This difference was not significant between layers  
136 ( $p=0.110$ ). L5 and L3c pyramidal cells also had slower membrane time constants ( $\tau_m$ ) compared to L2&3  
137 (L2&3:  $13.7 \pm 7.1$  ms, L3c:  $17.1 \pm 5.7$  ms, L5:  $19.3 \pm 9.1$  ms,  $p<0.0001$ ; Fig. 1d).

138 In general, we found considerable electrophysiological heterogeneity among neurons sampled within  
139 each cortical layer, broadly consistent with the morphological reconstructions shown in Figure 1a. For  
140 example, we found that pyramidal cells in L5 had input resistances as low as 20 M $\Omega$  and as high as 200 M $\Omega$ ,  
141 possibly reflecting the dichotomy between thin- and thick-tufted pyramidal cells and/or the graded  
142 variation between pyramidal cells of varying sizes and dendritic complexities (as well as the potential  
143 inadvertent cutting of dendrites during slice preparation, see Discussion).

144 We further compared these findings to published and publicly available datasets from human  
145 pyramidal cells. We note that the average input resistance among our population of recorded L5 pyramidal  
146 cells is considerably higher than that reported in Beaulieu-Laroche et al.<sup>3</sup>, most likely due to differences in  
147 the neurons targeted for recordings between our studies. We also made use of a publicly-accessible dataset  
148 of 272 pyramidal cells sampled from L2, L3, and L5 from an additional cohort of 39 human surgical patients  
149 characterized by the Allen Institute for Brain Sciences (<http://celltypes.brain-map.org/>). We note that while  
150 the overall experimental design of the Allen Institute's dataset is similar to ours, there are some  
151 methodological differences, such as the composition of solutions used for slice preparation and recording  
152 (see Methods). The Allen Institute data are generally consistent with our finding that input resistances in  
153 L5 pyramidal cells are not smaller than those sampled in human L2 and L3 (Supplementary Fig 1a) and that  
154 this trend holds even in neurons where the primary dendrites are not visibly truncated (Supplementary Fig.  
155 1b). We further note that, while it appears L5 neurons have increased variability in these intrinsic properties  
156 relative to L2&3, the levels of heterogeneity are consistent with prior reports from L2&3 in previous human  
157 studies<sup>4,27,28</sup>.

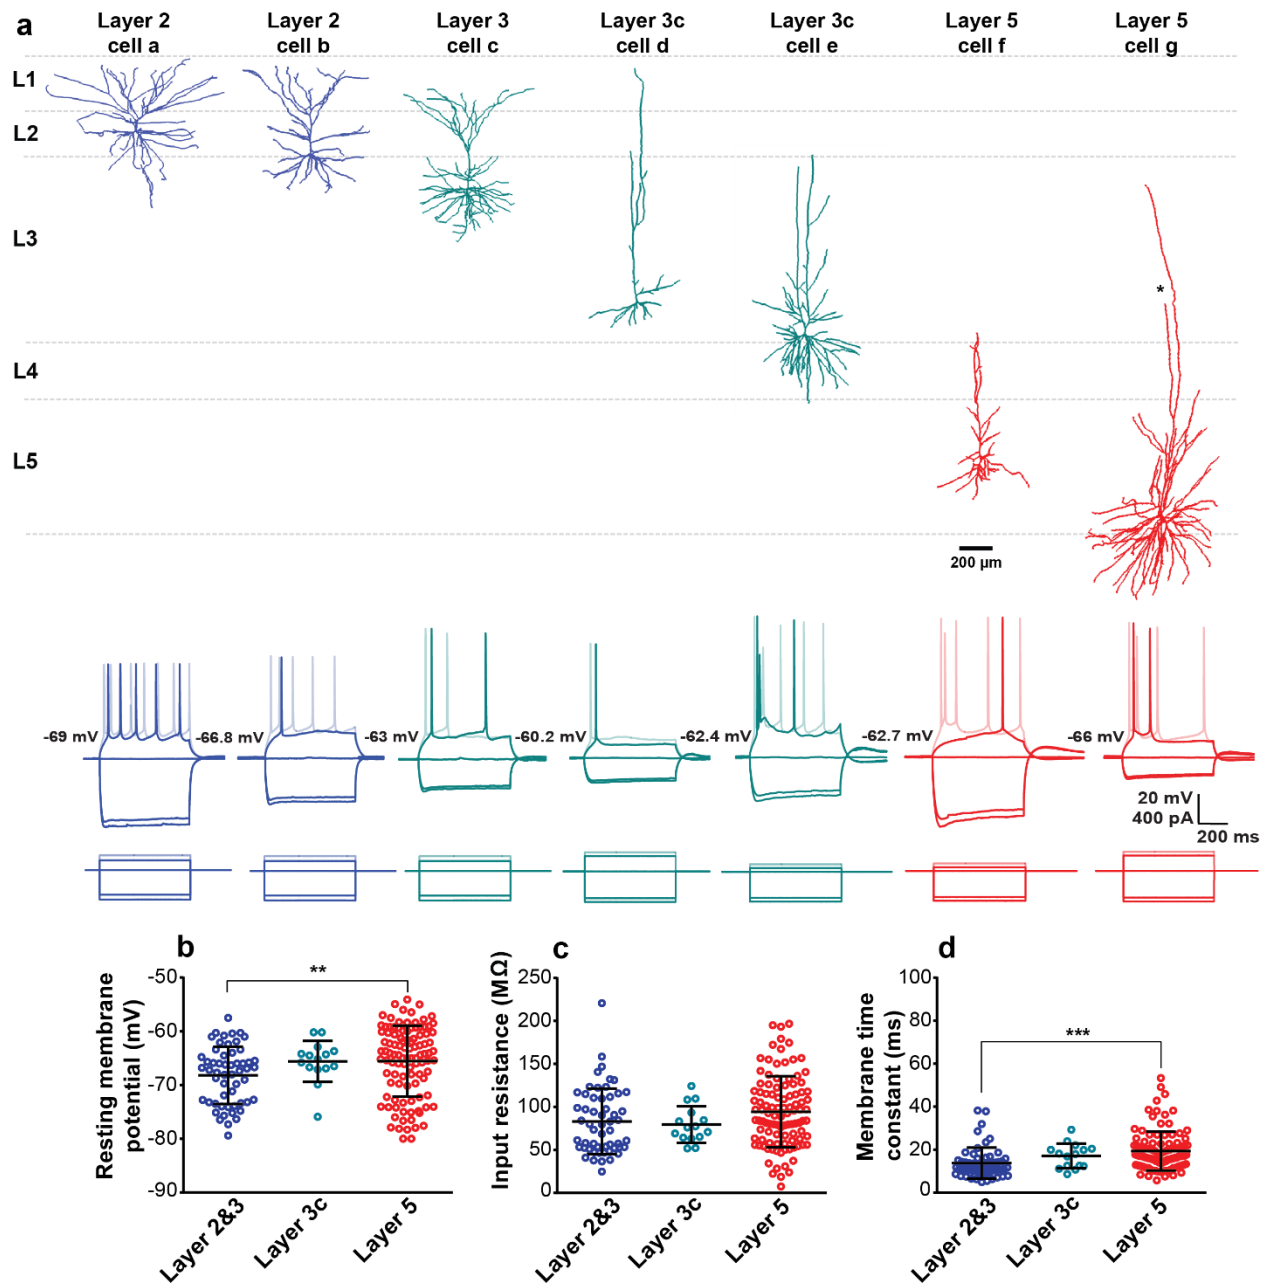

158

159 **Figure 1. Diverse morphologies and passive membrane properties among pyramidal cells in the human**  
 160 **neocortex.** **a** Example 3D reconstructions (top) and voltage traces (bottom) for L2&3, L3c and L5 pyramidal  
 161 cells following hyperpolarizing and depolarizing current injection. Cortical layer and relative position from  
 162 pial surface are annotated for each reconstructed cell. Asterisk in one branch of apical dendrite in cell g  
 163 with truncation (dendrite morphologies were otherwise not visibly truncated). **b, c, d** Resting membrane  
 164 potentials ( $p=0.007$ ) (**b**), input resistances ( $p=0.111$ ) (**c**) and membrane time constants ( $p<0.001$ ) (**d**) for  
 165 pyramidal cells in L2&3, L3c, and L5. Error bars in b-d denote mean and standard deviations (SD). One-Way  
 166 ANOVA post hoc with Dunn's multiple comparison test were used for statistical comparison. L2&3 ( $n=56$ ),  
 167 L3c ( $n=15$ ) and L5 ( $n=105$ ). Source data are provided as a Source Data file.



168 **Subthreshold active membrane properties of pyramidal cells in L2&3, L3c and L5**

169 To assay sag voltage and rebound depolarization we injected a series of hyperpolarizing currents (L2&3:  
170 n=56, L3c: n=15, L5: n=105). L5 pyramidal cells had significantly larger sag voltage amplitudes than L2&3  
171 pyramidal cells (L2&3:  $1.7 \pm 1.1$  mV, L3c:  $2.3 \pm 0.7$  mV, L5:  $3.2 \pm 1.9$  mV,  $p < 0.0001$  between L2&3 and L5;  
172 Fig. 2a, b). We found similar results using the dimensionless sag ratio measure that normalizes for input  
173 resistance differences between neurons (Supplementary Fig. 2a). We note that sag ratio is positively  
174 correlated with sag amplitudes (Supplementary Fig. 3,  $r=0.68$ ). These results were further replicated from  
175 the Allen Institute dataset (Supplementary Fig. 4; L2:  $0.51 \pm 0.045$ ; L3:  $0.125 \pm 0.067$ ; L5:  $0.149 \pm 0.072$ ;  $p$   
176  $= 2.21 \times 10^{-6}$  between L2 and L3,  $p=0.012$  between L3 and L5). These findings support recent evidence for  
177 a positive correlation between sag voltage amplitude and distance from pial surface<sup>4</sup> with our results  
178 further extending this relationship to L5.

179 In addition, 21.9% of L5 neurons exhibited rebound spiking following the termination of a  
180 hyperpolarizing current pulse, whereas 1.8% of L2&3 neurons exhibited rebound spiking, and rebound  
181 spiking was not observed in L3c neurons. The rebound depolarization amplitude was significantly larger in  
182 L5 pyramidal cells compared to L2&3 and L3c neurons (L2&3:  $1.8 \pm 1.6$  mV, L3c:  $2.9 \pm 1.8$ , L5:  $4.2 \pm 3$  mV,  
183  $p < 0.001$  between L2&3 and L5; Fig. 2c).

184 To further characterize the  $I_h$  specific component of membrane sag voltage we bath applied the specific  
185  $I_h$  blocker ZD7288 (10  $\mu$ m; ZD), with example traces shown in Figure 2d. For L2&3 (n=13), L3c (n=4) and L5  
186 (n=10) pyramidal cells, after bath applying ZD we observed a significant reduction in voltage sag amplitude  
187 (L2&3: before  $1.3 \pm 0.9$  mV, after  $0.2 \pm 0.3$  mV,  $p=0.001$ , L3c: before  $2.4 \pm 1.4$  mV, after  $0.9 \pm 0.9$  mV,  
188  $P=0.100$ , L5: before  $3.1 \pm 2.8$  mV, after  $0.9 \pm 0.8$  mV,  $p=0.002$ ; Fig. 2e) and in sag ratio (Supplementary Fig.  
189 2b). Bath applying ZD7288 also significantly reduced the rebound depolarization amplitude (L2&3: before  
190  $1.3 \pm 1.1$  mV, after  $-0.8 \pm 1.5$  mV,  $p=0.001$ , L3c: before  $3 \pm 2.3$  mV, after  $0.9 \pm 1.6$  mV,  $p=0.100$ , L5: before  
191  $2.1 \pm 1.9$  mV, after  $-1.2 \pm 2.3$  mV,  $p=0.002$ ; Fig. 2f).

192 Voltage-clamp experiments were performed in a subset of neurons (L2&3: n=6, L5: n=10) to determine  
193 if the  $I_h$  amplitude differences arose from differences in channel kinetics between these two cell-types.  
194 While space-clamp issues limit our ability to adequately voltage clamp distal cellular processes<sup>30</sup>, we  
195 nevertheless considered it beneficial to use this technique to obtain semi-quantitative estimates of the  
196 amplitudes, kinetics, and voltage dependence of  $I_h$  in human pyramidal cells. We used pharmacological  
197 blockers to specifically isolate  $I_h$  (see Methods). We found that injecting voltage steps from -60 to -140mV  
198 produced a slowly activating inward current (example traces shown in Supplementary Fig. 5a). Consistent  
199 with our current clamp results, we found that the amplitudes of the  $I_h$  were significantly smaller in L2&3  
200 neurons compared with L5 (Supplementary Fig. 5c), whereas the time course of  $I_h$  activation and the voltage  
201 sensitivity of  $I_h$  (quantified at the half maximal activation voltage) was similar between L2&3 and L5 neurons  
202 (Supplementary Fig. 5b and d). These results suggest that the relatively larger L5 sag amplitude arises from  
203 increased channel numbers rather than differences in channel kinetics.

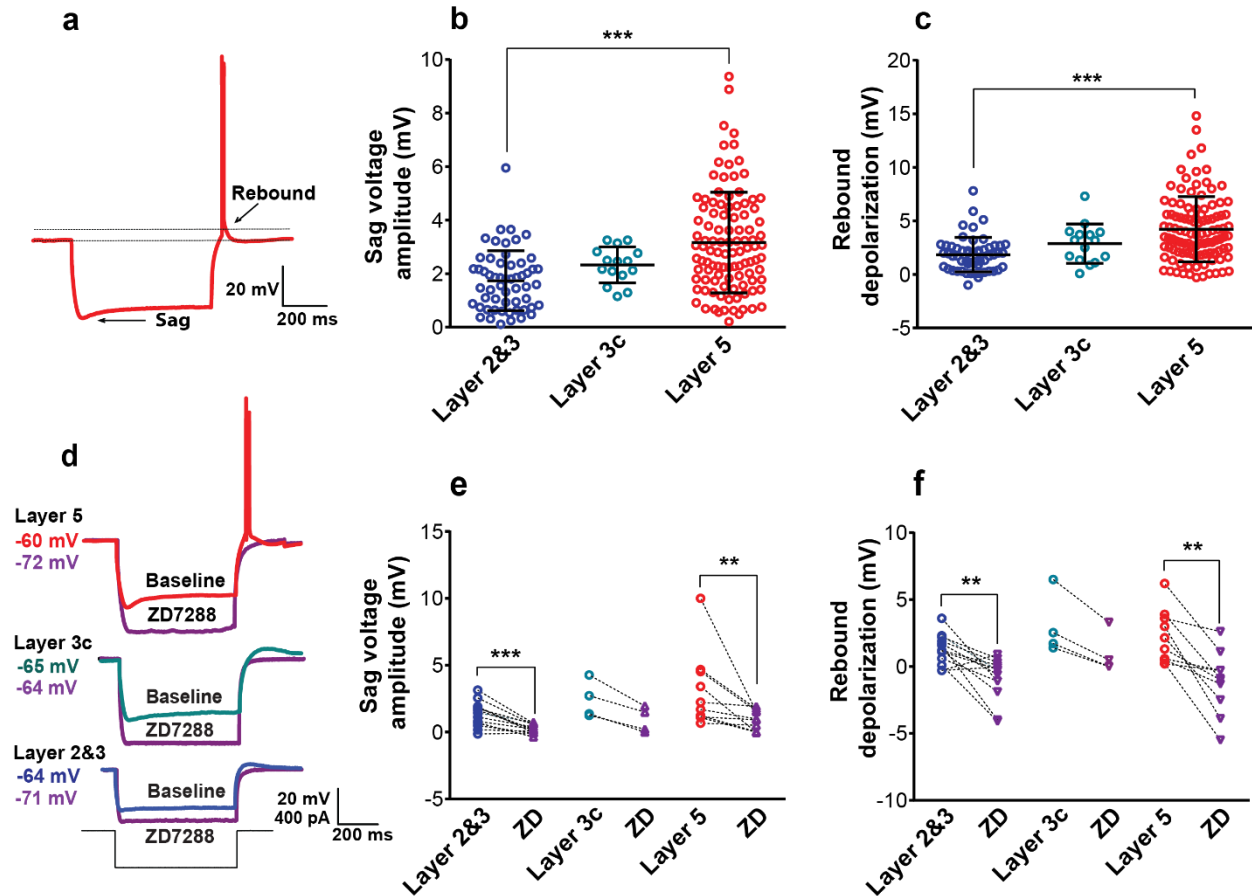

204

205 **Figure 2.  $I_h$  related membrane properties are more apparent in L5 pyramidal cells compared to L2&3 and**  
 206 **L3c. a** Example voltage sweep from a representative L5 pyramidal cell during injection of -400 pA  
 207 hyperpolarizing current step. Arrows indicate sag voltage and rebound depolarization and post-  
 208 hyperpolarization rebound spiking. **b, c** Sag voltage amplitude ( $p < 0.0001$ ; One-Way ANOVA post hoc with  
 209 Dunn's multiple comparison test, L2&3 ( $n = 56$ ), L3c ( $n = 15$ ) and L5 ( $n = 105$ )). (b) and rebound depolarization  
 210 amplitude ( $p < 0.0001$ ; One-Way ANOVA post hoc with Dunn's multiple comparison test, L2&3 ( $n = 56$ ), L3c  
 211 ( $n = 15$ ) and L5 ( $n = 105$ )). (c) among sampled L2&3, L3c, and L5 pyramidal cells in response to injection of  
 212 hyperpolarizing current. Lines and error bars denote mean and SD and asterisks indicate significance of  
 213 group comparison. **d** Example of voltage sweeps at baseline (red, green, and blue) and after (purple) bath  
 214 application of the  $I_h$  blocker ZD7288 (10  $\mu$ M) following injection of -400 pA. **e, f** Bath application of ZD7288  
 215 diminished sag voltage amplitude (L2&3-ZD:  $p = 0.001$ ,  $n = 13$ ; L3c-ZD:  $p = 0.125$ ,  $n = 4$ ; L5-ZD:  $p = 0.002$ ,  $n = 10$ ;  
 216 Wilcoxon matched-pairs signed rank test) (e) and rebound depolarization amplitude (L2&3-ZD:  $p = 0.002$ ,  
 217  $n = 13$ ; L3c-ZD:  $p = 0.125$ ,  $n = 4$ ; L5-ZD:  $p = 0.002$ ,  $n = 10$ ; Wilcoxon matched-pairs signed rank test) (f) in all layers.  
 218 Source data are provided as a Source Data file.

219

## 220 **Suprathreshold active membrane properties of pyramidal cells in layers 2/3, L3c and 5**

221 Active membrane property differences between layers were characterized by examining the firing  
 222 patterns of L2&3, L3c and L5 human pyramidal cells ( $n = 55$ ,  $n = 15$ ,  $n = 104$  neurons respectively) using a series  
 223 of depolarizing current pulses (0-400 pA, 600ms) with examples shown in Figure 3a-c. L5 neurons had a  
 224 significantly larger action potential than L2&3 neurons (L2&3:  $81.9 \pm 13.2$  mV, L3c:  $88.3 \pm 7.5$  mV, L5:  $88.7$



225  $\pm 18.2$  mV,  $p=0.020$ ; Fig. 3d). In addition, the action potential half-width was similar in L5 compared to L2&3  
226 (L2&3:  $1.8 \pm 0.6$  ms, L5:  $1.8 \pm 0.7$  ms). However, the half-width of the action potential was significantly  
227 longer in L3c pyramidal cells compared to L2&3 ( $p=0.029$ , L3c:  $2.2 \pm 0.6$  ms) and L5 pyramidal cells ( $p=0.022$ ,  
228 Fig. 3f).

229 The frequency-current relationships (f-I curve) showed greater f-I slopes for L5 relative to L2&3  
230 and L3c neurons (Fig. 3g; at 300 pA, L2&3:  $16.3 \pm 12.2$  Hz, L3c:  $11.0 \pm 12.2$  Hz, L5:  $21.8 \pm 13.1$  Hz,  $p=0.003$   
231 between L2&3 and L5 neurons, and  $p=0.001$  between L5 and L3c neurons). The current needed to elicit an  
232 action potential was significantly lower in L5 neurons compared to L2&3 (L2&3:  $162.1 \pm 81.9$  pA, L3c:  $153.5$   
233  $\pm 66.6$  pA, L5:  $121.1 \pm 85.2$  pA,  $p=0.002$  between L2&3 and L5; Fig. 3h). We also note that these distributions  
234 were especially broad, particularly for L5 pyramidal cells, mirroring the large range in input resistances and  
235 diverse morphologies of these neurons (Figure 1). L5 neurons showed significantly less spike frequency  
236 adaptation relative to L2&3 and L3c neurons (L2&3:  $0.16 \pm 0.16$ , L3c:  $0.25 \pm 0.16$ , L5:  $0.11 \pm 0.13$ ,  $p=0.010$   
237 between L5 and L2&3,  $p=0.001$  between L5 and L3c; Fig. 3i). Lastly, we identified a small number of bursting  
238 neurons (defined as those with instantaneous frequencies at rheobase  $>75$ Hz) in our dataset (e.g., the L5  
239 cell illustrated in Fig. 3c and further examples in Supplementary Fig. 6). Specifically, we found 14% of our  
240 recorded L2&3 pyramidal cells and 9.5% of L5 pyramidal cells showing bursting activity. The overall low  
241 number of bursting neurons in both superficial and deeper cortical layers of human neocortex are  
242 consistent with previous report of infrequent bursting in human neocortex<sup>3</sup>.

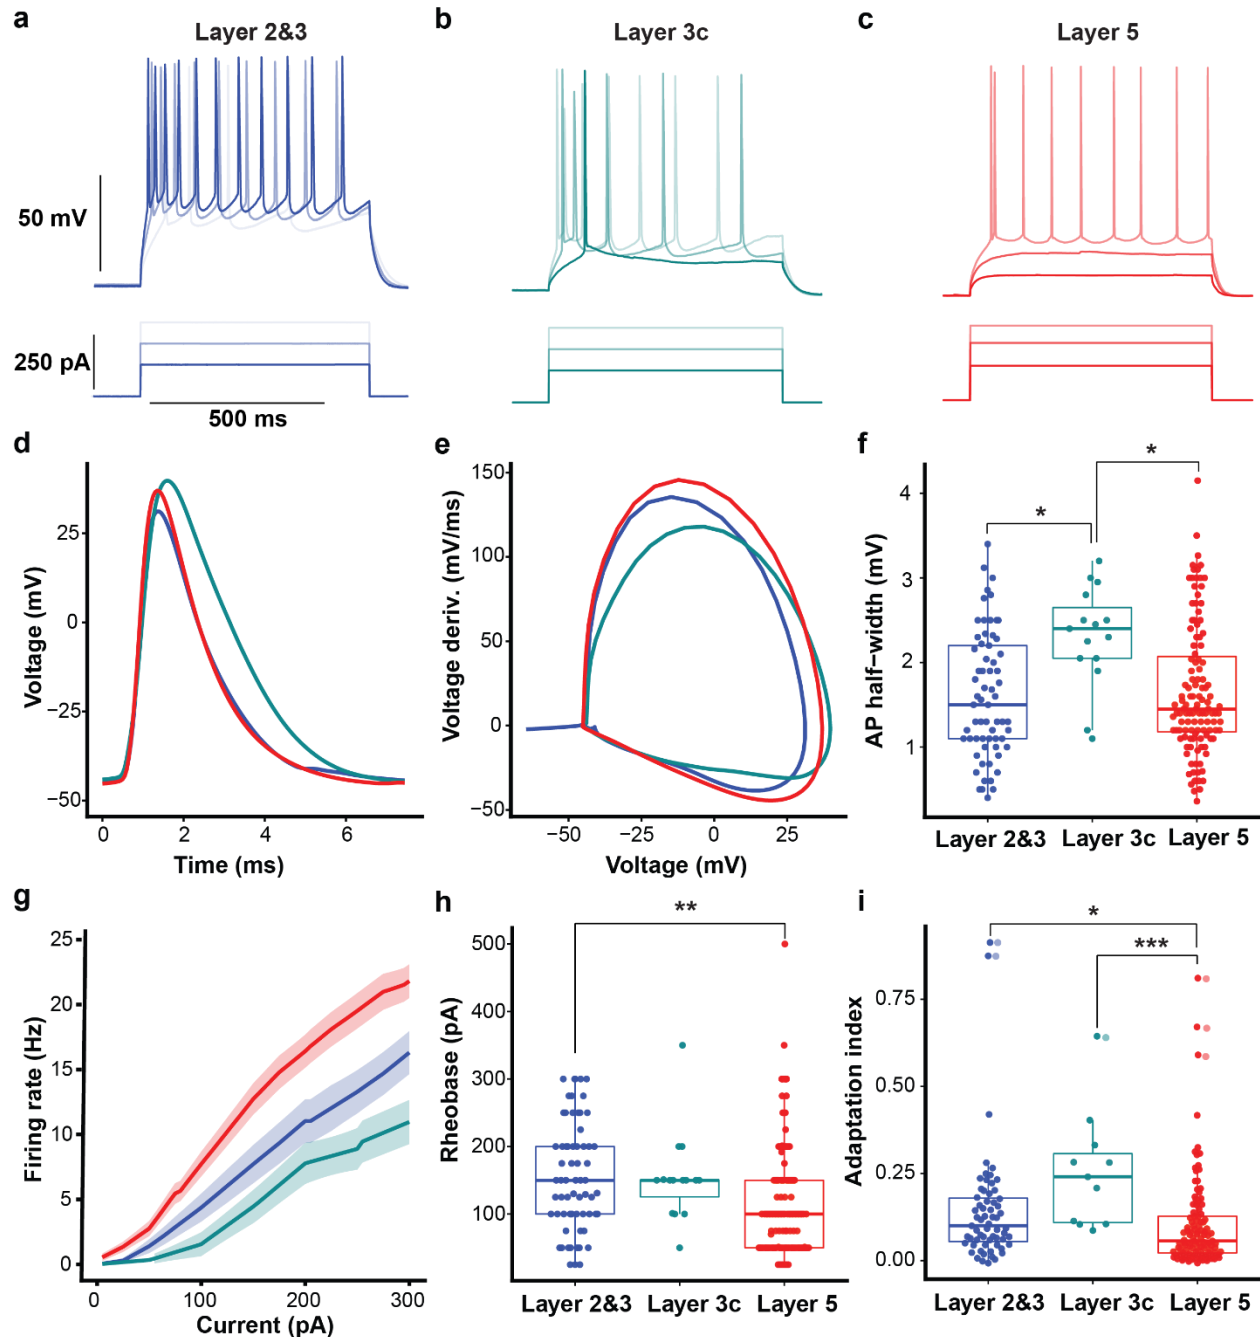

243

244 **Figure 3. L5 pyramidal cells display higher frequency firing rate and less adaptation than L2&3 and L3c**  
 245 **neurons. a, b, c** Example L2&3, L3c and L5 pyramidal cell voltage responses following depolarizing current  
 246 injections (150 pA, 250 pA and 300 pA, 600 ms). **d, e** Action potential waveform (d) and action potential  
 247 phase plot (e) averaged over recorded pyramidal cells in each layer. **f** L5 pyramidal cells had a smaller action  
 248 potential half-width compared to L2&3 and L3c neurons which was not significant in comparison with L2&3  
 249 neurons. Half-width of action potential was higher significantly in L3c pyramidal cells compared with L2&3  
 250 and L5 neurons ( $p=0.029$  between L2&3 and L3c,  $p=0.022$  between L3c & L5). **g** Current versus firing rate  
 251 relationships (FI curves), averaged over pyramidal cells recorded in each layer. Shaded bands indicate SEM.

252 **h** L5 pyramidal cells needed less depolarizing current to display first action potential compared to L2&3 and  
253 L3c neurons ( $p=0.002$ ). **i** L5 pyramidal cells show less spike frequency adaptation, quantified using the  
254 adaptation index measure, in comparison with L2&3 and L3c. ( $p=0.016$  between L2&3 and L5;  $p=0.001$   
255 between L3c and L5). One-Way ANOVA post hoc with Dunn's multiple comparison test were used for  
256 statistical comparison L2&3 ( $n=55$ ), L3c ( $n=15$ ) and L5 ( $n=104$ ). Data presented as mean  $\pm$ SD in panels f, h  
257 and i. Boxplots in f, h, I denote interquartile range and whiskers denote data range excluding outliers.  
258 Source data are provided as a Source Data file.

#### 259 **Subthreshold and suprathreshold frequency preference in human pyramidal cells across cortical layers**

260 Resonance is a common approach to characterize the frequency preferences of neurons and  
261 represents the net result of the interaction between passive and active properties<sup>32</sup>. Indeed, human  
262 pyramidal cells, and in particular those in deeper part of L3 as well as thick-tufted neurons in L5, can exhibit  
263 low frequency subthreshold resonance<sup>3,4</sup>. These findings in human neurons are consistent with studies in  
264 rodent cortex that describe the correlation between a large sag voltage and low frequency resonance<sup>33</sup>.

265 We examined subthreshold resonance in our recorded L2&3, L3c and L5 pyramidal cells using a 20  
266 second long frequency-modulated (or ZAP) current stimulus delivered at the resting membrane potential  
267<sup>21</sup>. Our analysis revealed clear examples of resonant pyramidal cells in each of the three major layers we  
268 profiled (Fig. 4a and b) and identified a number of neurons that displayed a non-zero peak in their resonant  
269 frequency (fR; 27% of L2&3 neurons; 47% of L3c neurons; and 40% of L5 neurons), but considerably few  
270 neurons with resonant frequencies greater than 2Hz (Fig. 4c). We found there was a slight trend of a  
271 decrease in the 3dB cutoff frequency in L5 relative to L2&3 neurons ( $p=0.050$ , Fig. 4d). These results are  
272 generally consistent with recent evidence for greater subthreshold resonance in the deeper part of the  
273 supragranular layers of the human neocortex relative to more superficial neurons<sup>4</sup>. While we observed a  
274 smaller fraction of resonant cells than previous work, we note that our results correspond with the  
275 conclusion that human L2&3 pyramidal cells are most likely to have normalized impedance peaks at  $<2$ Hz,  
276 while neurons with peaks at  $>4$ Hz are quite rare. Possible explanations for the lower fraction of resonant  
277 cells in our data include our use of different experimental solutions than Kalmbach et al., as well as the  
278 possibility of inadvertent dendrite truncation in these experiments (see Discussion). Additionally, our  
279 neurons displayed a slightly more depolarized RMP<sup>4</sup>, which is a determinant of observing resonance<sup>31</sup>.

280 We further compared the frequency response characteristics of L2&3 and L5 pyramidal cells in  
281 response to suprathreshold ZAP current injections with example traces shown in (Fig. 4e). We found that  
282 L5 neurons spike with greater fidelity to higher frequency stimuli (12-18Hz) relative to L2&3. We did not  
283 observe a difference in frequency tracking at other frequency ranges (Fig. 4f), including frequencies at delta  
284 or theta (1-8Hz). We note that the lack of direct correspondence between our sub- threshold and firing  
285 rate resonance properties is not surprising, especially in light of theoretical and computational explorations  
286 that reveal the lack of a direct link between sub- and suprathreshold stimuli responses<sup>34-37</sup>.

287

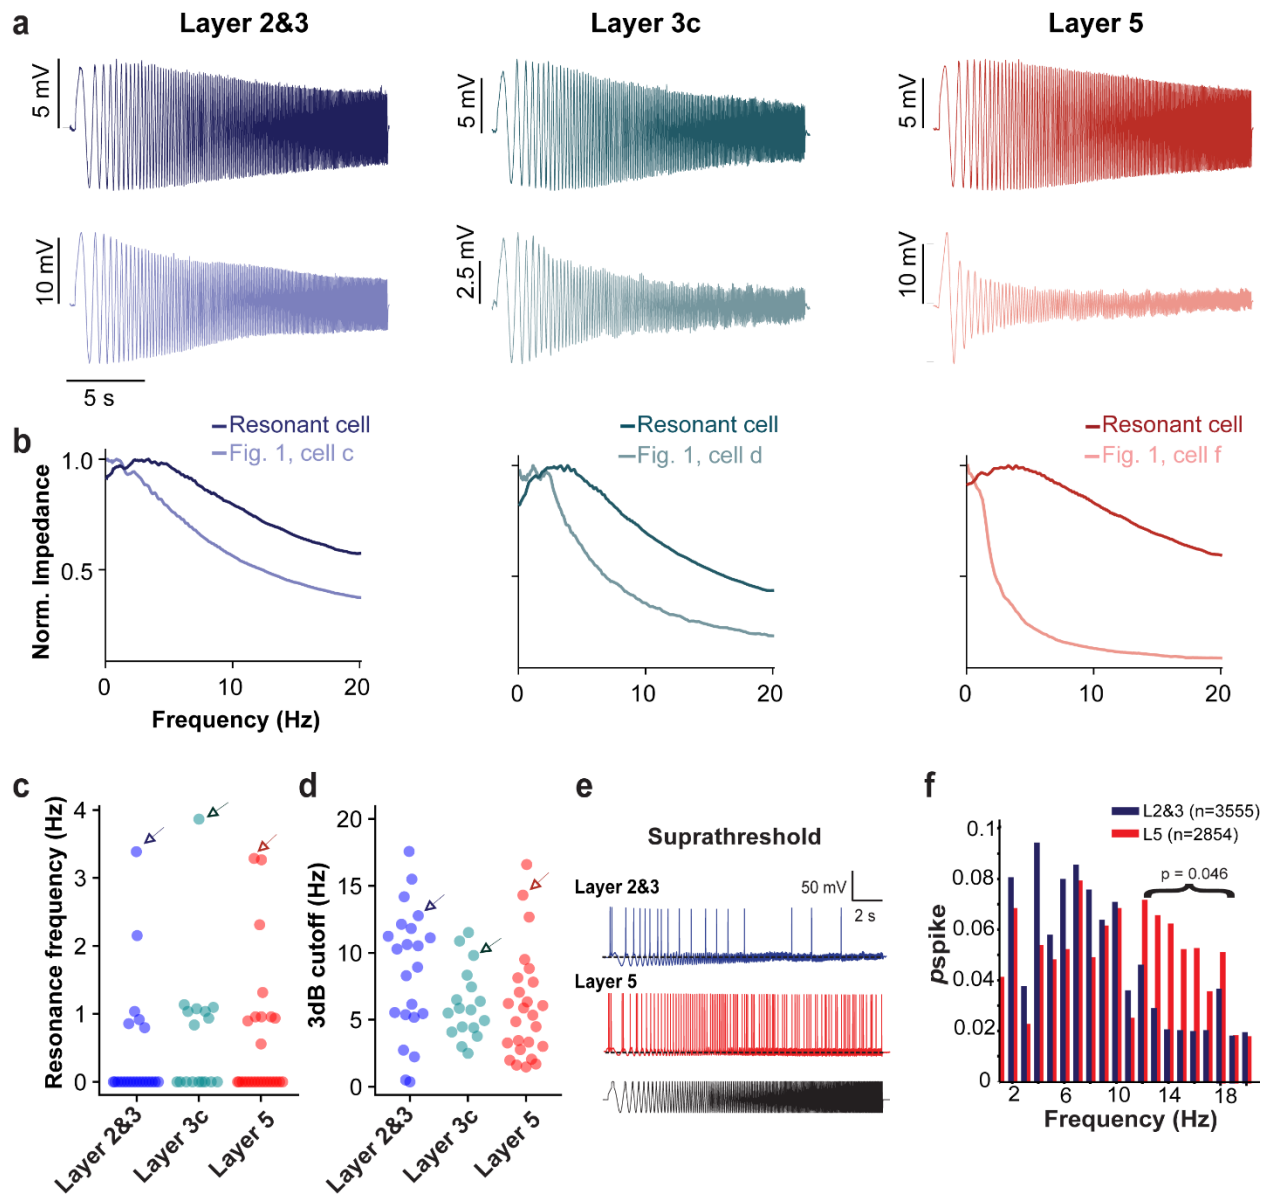

288

289 **Figure 4. Subthreshold and suprathreshold resonance properties of L2&3, L3c and L5 pyramidal cells.**

290 **a** Example voltage responses following injection of subthreshold frequency-modulated (ZAP) current

291 delivered at resting membrane potential in L2&3, L3c and L5 pyramidal cells. Voltage traces are averaged

292 across 5 repeated trials. Top voltage trace indicates response of a cell displaying subthreshold resonance

293 and bottom trace corresponds to example cell morphologies shown in Figure 1. Cell labels are provided

294 below in **b**. **b** Normalized impedance profiles for the voltage traces shown in **a**, with impedances normalized

295 to a maximum value of one. **c,d** Resonance frequencies (**c**) and 3dB cutoff frequencies (**d**) indicate that

296 there are relatively few strongly resonant pyramidal cells in our dataset. Arrows in **c** and **d** correspond to

297 resonant cells highlighted in **a** and **b**.  $n = 23, 17, 25$  cells in L2&3, L3c, L5 respectively. **e** Example voltage

298 responses following injection of suprathreshold ZAP current. **f** Spike response probability in response to

299 suprathreshold current injection shows that L2&3 and L5 pyramidal cells track theta frequencies with

300 greater reliability. The distributions were not significantly different ( $KSp=0.530$ ). Above 12Hz spike

301 probabilities differed significantly between L2&3 and L5 ( $p=0.046$ ; Two-sample Kolmogorov–Smirnov, L2&3  
302  $n=27$ , L5  $n=30$ ). Source data are provided as a Source Data file.

303

304 [Assessment of frequency-dependent gain reveals greater preference for delta and theta frequencies](#)  
305 [among L5 relative to L2&3 pyramidal cells](#)

306 To further investigate the suprathreshold frequency preference of human neurons, a key determinant  
307 of their participation in the amplification and/or generation of oscillations <sup>20</sup>, we characterized the  
308 frequency dependent gain [ $G(f)$ ] and the mean phase shift of the spike response (Fig. 5a) <sup>38</sup> in a subset of  
309 neurons ( $n=8$  neurons each for L5 and L2&3) from an additional set of patients ( $n=5$ ).  $G(f)$  was quantified  
310 via stimulating neurons with multiple trials of a frozen filtered white noise current stimulus. This measure  
311 captures distinct neuronal features compared to sub- or suprathreshold resonance: while resonance  
312 identifies the likelihood of a spike occurring from a drive at a particular frequency that is itself is  
313 suprathreshold, the frequency dependent gain quantifies the phase preference of neuronal spiking as a  
314 function of frequency <sup>39</sup> from a noisy input that is relatively small <sup>38</sup>. Neurons with a high gain at a specific  
315 frequency are more likely to have a phase preference at that frequency than at other frequencies.

316 We found that both L2&3 and L5 neurons displayed peaks in  $G(f)$  within the delta and theta frequency  
317 ranges (Fig. 5b). Both peaks were significantly more pronounced in L5 pyramidal cells compared to L2&3  
318 ( $p<0.05$ ). Additionally, above 10Hz, we found that L5 pyramidal cells displayed greater frequency  
319 dependent gain than L2&3 neurons, corresponding with the intuition from our suprathreshold ZAP results  
320 (Fig. 4f). The greater excitability and fidelity of L5 neurons was also evident in their phase curves and spike  
321 triggered averages (STAs) (Fig. 5c and d). L2&3 neurons demonstrated a greater lag in firing than L5  
322 neurons, and their STA were of larger amplitude with steeper slopes. This suggests that L2&3 neurons  
323 require larger inputs to trigger spikes, and when they do spike, they will lag behind L5 pyramidal cells if  
324 inputs are coincident.

325 To explore the contribution of  $I_h$  to  $G(f)$  for both L2&3 ( $n=3$ , Fig. 5e) and L5 pyramidal cells ( $n=3$ , Fig.  
326 5f), ZD7288 (an  $I_h$  blocker) was applied to compare  $G(f)$  before and after abolishing the  $I_h$ . We found that  
327 blocking  $I_h$  predominantly abolished the delta peak in L5 neurons. These data indicate that human L5  
328 pyramidal cells are better at tracking both delta and theta frequency inputs than superficial layer neurons  
329 (although L3c neurons were not tested in this way), and our (perhaps preliminary) explorations of the effect  
330 of ZD on the frequency dependent gain provides evidence that the larger  $I_h$  in L5 pyramidal cells plays an  
331 important role in their increased responsiveness to delta frequency inputs.

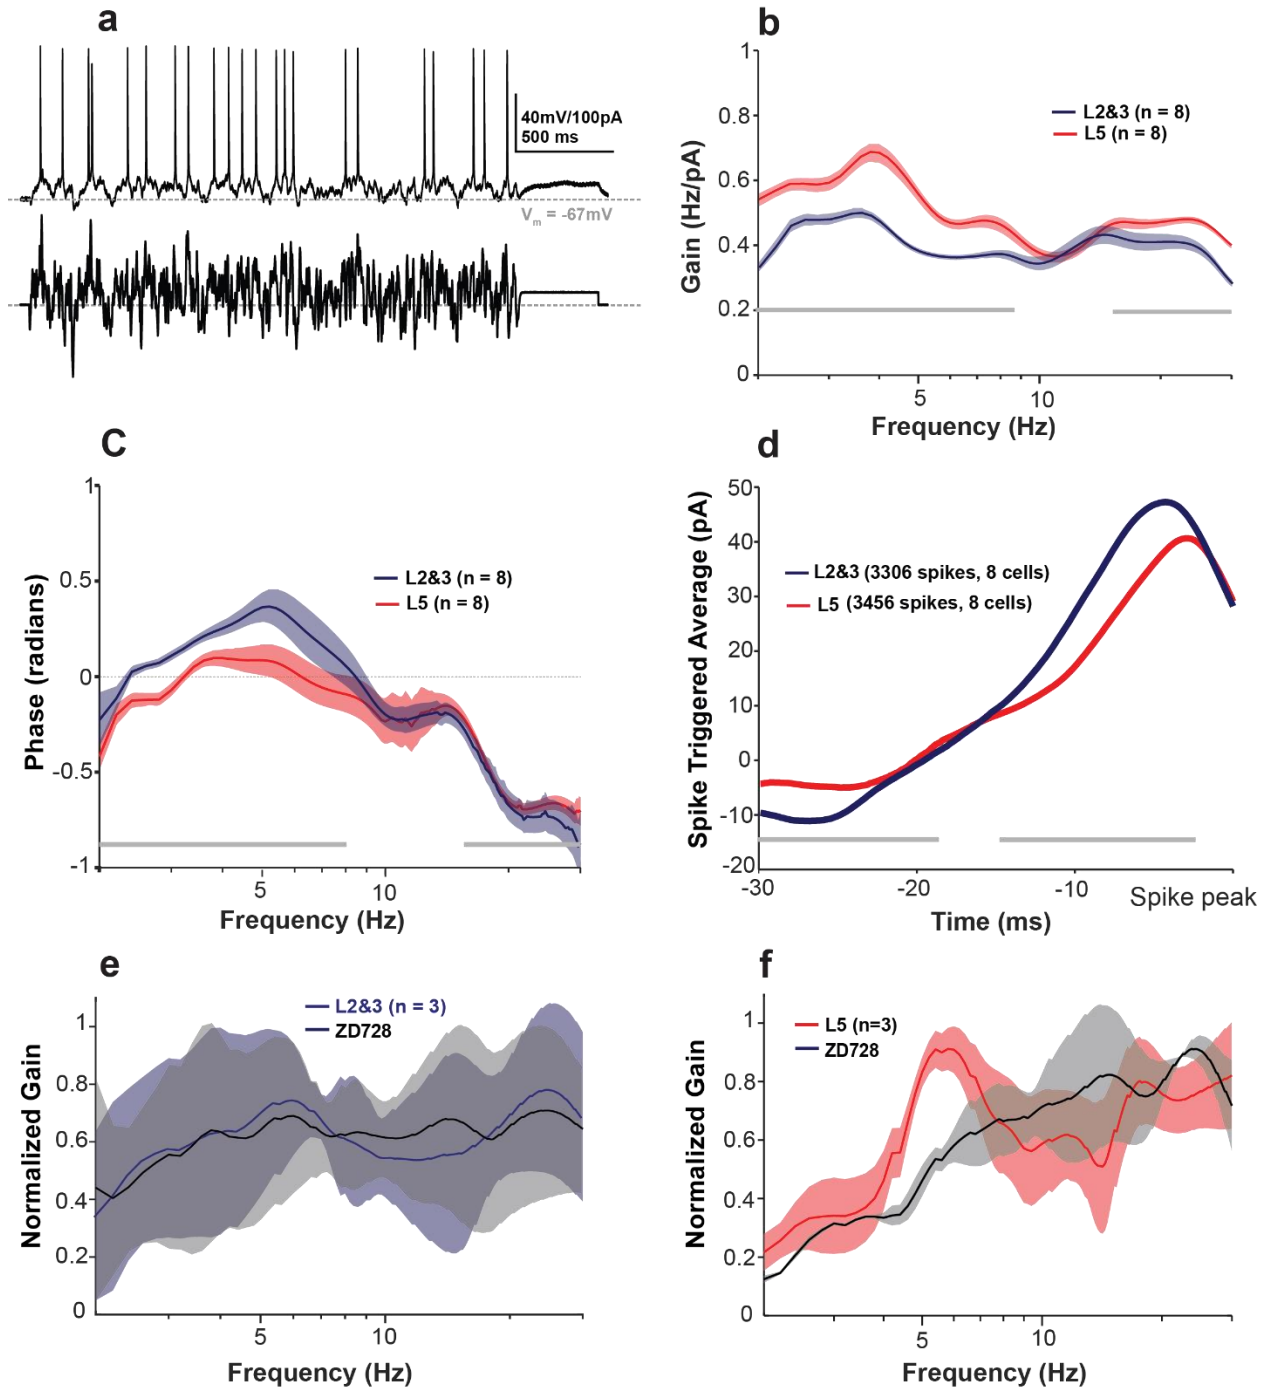

332

333 **Figure 5: Human L5 neurons display greater gain at delta and theta frequencies than L2&3 pyramidal**  
 334 **cells.** **a** Example of  $V_m$  response of L5 pyramidal cell to 2.5 seconds of frozen filtered Gaussian white noise  
 335 current injection. **b** Frequency dependent gain  $G(f)$  profile of L2&3 and L5 pyramidal cells over a wide range  
 336 of frequencies. Both layers show two peaks around 2.5-10Hz, and 12-16Hz which are more pronounced in  
 337 L5 pyramidal cells compared to L2&3. Gray horizontal bars represent significant differences between  
 338 groups ( $p < 0.05$ ; Mann-Whitney U). **c** Phase shift of spiking relative to input stimulus. L2&3 pyramidal cells  
 339 show positive phase in their mean phase shift profile which represents a lag in L2&3 pyramidal cells



340 compared to L5 pyramidal cells ( $p < 0.05$ ; Mann-Whitney U). **d** Mean spike triggered average (STAs) for L5  
341 and L2&3 neurons. Difference in STAs indicate L5 neurons require less current and instantaneous rate of  
342 current increase to initiate a spike (greater excitability). **e,f** Frequency dependent gain profile (mean  $\pm$  one  
343 standard deviation) of L2&3 ( $n=3$ ; RMP:  $-66.2 \pm 2.9$  mV, Input resistance:  $105 \pm 26.46$  M $\Omega$ ) (e) and L5 ( $n=3$ ;  
344 RMP:  $-66.8 \pm 3.1$  mV, Input resistance:  $81.3 \pm 12$  M $\Omega$ ) (f) pyramidal cells before and after  $I_h$  blocker (ZD7288  
345 10  $\mu$ M). ZD7288 abolished the low frequency peaks in L5 neurons with little change in frequency dependent  
346 gain in L2&3 neurons. Source data are provided as a Source Data file.

347

348 [Considerable heterogeneity and overlap in electrophysiological features among pyramidal cells](#)  
349 [sampled across different layers of the human neocortex](#)

350 Given the large degree of variability among intrinsic electrophysiological features in the pyramidal cells  
351 in our study, we next sought to identify gradients or sub-clusters among these neurons. For example, in  
352 rodent neocortex, there is strong convergent evidence that pyramidal cells from L5 are split into two major  
353 subclasses, with neurons from L5a more likely to be regular spiking, IT projecting. IT cells show slender  
354 tufted dendritic morphologies compared to pyramidal cells in L5b, which are more likely to be bursting, ET,  
355 and show thick-tufted dendritic morphologies<sup>29,41</sup>. In the human neocortex there is evidence for this  
356 dichotomy based on transcriptomics data, although there are likely far fewer ET neurons than IT neurons  
357 in human L5 relative to the rodent (Supplementary Fig. 9)<sup>26</sup>, which to our knowledge has yet to be  
358 corroborated at the electrophysiological and morphological levels.

359 We addressed this question using dimensionality reduction techniques to arrange our neurons by  
360 similarity in multi-variate sets of electrophysiological features (L2&3:  $n=56$ , L3c:  $n=14$ , L5:  $n=103$  neurons).  
361 We specifically used UMAP<sup>42</sup> using 14 subthreshold and suprathreshold electrophysiological features that  
362 were consistently calculated in the majority of pyramidal cells within our dataset (see Methods). We found  
363 some evidence for gradients and/or subclusters among the sampled neurons based on the input  
364 electrophysiological features (Fig. 6a). Upon further inspection we found that a single major factor related  
365 to cell input resistance and rheobase current appeared to qualitatively define the major gradient underlying  
366 the differences in neurons highlighted by this analysis (Fig. 6b). We were able to corroborate aspects of this  
367 unbiased analysis through inspection of pyramidal cell morphologies (where available) with neurons at one  
368 extreme of the gradient having the largest input resistances and the most simple morphologies (e.g., cell a  
369 and cell f from Figure 1). Similarly, neurons with morphologies on the other side of the gradient tended to  
370 have lower input resistances and more complex morphologies such as the larger cell (cell g) shown in Figure  
371 1. This analysis also revealed that neurons throughout the gradient tend to show bursting behavior (Fig. 6c)  
372 and that neurons with intermediate input resistances (such as those sampled from L3c) are more likely to  
373 display subthreshold resonance (Fig. 6d).

374 The other major finding of this analysis is that neurons from each of the layers we sampled were  
375 often inter-mixed in the low-dimensional space, with neurons from L2&3 often displaying very similar  
376 electrophysiological profiles to those sampled in L5. The pyramidal cells sampled from L3c were one  
377 exception, as these were present primarily at a single position in the low-dimensional space along with  
378 other neurons of intermediate input resistance. As we did not see strong evidence for a subtype of L5  
379 neurons that were electrophysiologically distinct from those in L2&3 and other L5 neurons, we conclude  
380 that either we do not have L5 ET neurons present in our dataset (a strong possibility given their rarity,  
381 shown in Supplementary Fig. 9<sup>26</sup>) or that we are unable to distinguish them from IT neurons using  
382 electrophysiological features alone (see Discussion). In summary, these findings are largely consistent with  
383 recent transcriptomics data<sup>26</sup> that strongly suggests that layer membership is not particularly informative

384 dimension regarding pyramidal cell type diversity in human cortex, as many discrete transcriptomically  
 385 defined cell types do not obey strict laminar boundaries.

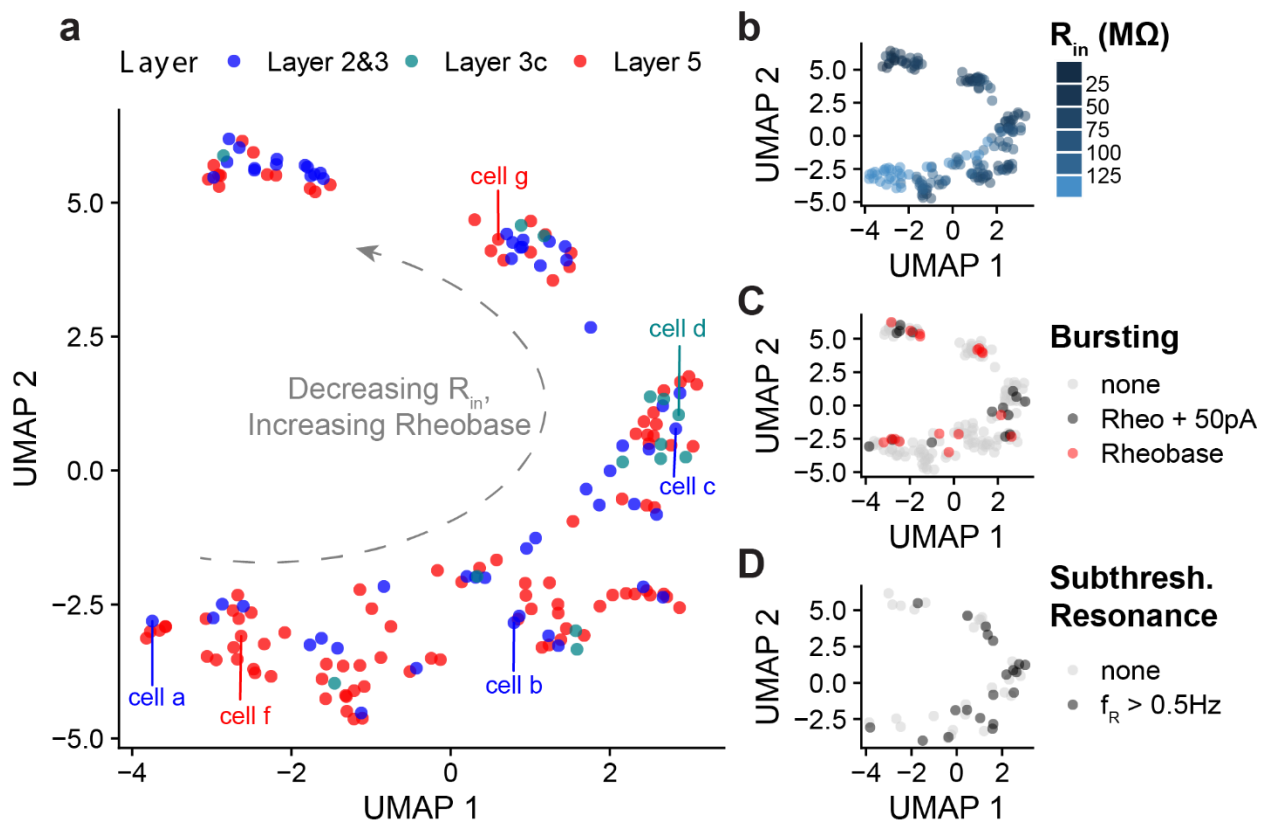

386

387 **Figure 6. Dimensionality reduction reveals considerable intrinsic electrophysiological similarity and**  
 388 **overlap between pyramidal cells recorded in different layers.** **a** Dimensionality reduction analysis  
 389 performed on multivariate sets of electrophysiological features using Uniform Manifold Approximation  
 390 (UMAP). Neurons are arranged by similarity in intrinsic electrophysiological features (see methods for list  
 391 of features used in analysis). Cell counts: L2&3: n=56, L3c: n=14, L5: n=103 neurons. Cell labels correspond  
 392 to neurons whose morphologies are highlighted in **Figure 1**. **b, c, d** Same as **a**, but neurons are colored by  
 393 input resistance (**b**), bursting behavior (**c**), or subthreshold resonance (**d**). Bursting behavior in **c** is broken  
 394 down by neurons that show no bursting, neurons that burst at rheobase current plus 50 pA, or neurons  
 395 that burst at rheobase. Bursting is defined where the instantaneous firing rate is greater than 75Hz. Source  
 396 data are provided as a Source Data file.

397

398 **Putative interneurons recorded in L5 show greater amounts of sag and subthreshold resonance relative to**  
 399 **L2&3**

400 Our data set also included several putative GABAergic interneurons (examples in Supplementary Fig.  
 401 7a; L2&3: n=10, L5: n=14). We were able to distinguish putative interneurons from pyramidal cells by their  
 402 action potential characteristics (Supplementary Fig. 7b, c), large maximal firing rates, and typically large  
 403 spike after-hyperpolarization amplitudes (see Supplementary Fig. 8 for morphological corroboration for  
 404 one putative interneuron from our dataset). We found the set of putative interneurons in L5 had larger sag  
 405 voltage amplitudes compared to putative interneurons in L2&3 (L2&3:  $1.2 \pm 1.1$  mV, L5:  $4.5 \pm 3.7$  mV,

406  $p=0.001$ ; Supplementary Fig. 7d). Moreover, L5 putative interneurons had significantly larger rebound  
407 depolarization amplitudes relative to L2&3 putative interneurons (L2&3:  $1.7 \pm 2.2$  mV, L5:  $5.2 \pm 3.2$  mV,  
408  $p=0.003$ ; Supplementary Fig. 7e). Moreover, while there was a relatively small number of interneurons that  
409 were characterized with ZAP current injection (examples in Supplementary Fig. 7f, g), we noticed a  
410 comparatively large fraction of L5 putative interneurons that displayed a non-zero peak in their resonant  
411 frequency (3 of 6 neurons) compared to L2&3 (1 of 3 neurons) ( Supplementary Fig. 7h). Although a small  
412 number of neurons and thus requiring corroboration, these data are consistent with prior reports of strong  
413 subthreshold resonance activity in human cortical GABAergic interneurons <sup>5</sup> and in rodent hippocampal  
414 interneurons <sup>43</sup>.

## 415 Discussion

416 Guided by our previous work implicating deep layer human pyramidal cells in driving coherent low  
417 frequency oscillations in human neocortex, we sought to characterize how the electrophysiological  
418 differences between deep and superficial human pyramidal cells might inform the distinct role deep layer  
419 cells might play in cortical oscillations. We summarize four major findings from this work.

420  
421 First, considering each broad cortical layer as a group, we found that there is a gradient of increased  
422 excitability from superficial to deeper layer pyramidal cells, with L2&3 pyramidal cells demonstrating more  
423 hyperpolarized resting potentials, lower input resistances and larger rheobase required for spike  
424 generation, enhanced spike frequency adaptation, and steeper and larger amplitude spike triggered  
425 averages. Along most of these features, the neurons sampled from L3c were often at an intermediate point  
426 between L2&3 and L5.

427  
428 Second, we found enhanced sag and  $I_h$ -related features in L5 neurons relative to L2&3 neurons, again  
429 with L3c neurons intermediate between these groups.  $I_h$  appeared to be one of the major contributors to  
430 the prominent rebound depolarization and rebound spiking in human L5 neurons, as ZD7288 significantly  
431 reduced both.  $I_h$  also contributed to enhanced frequency-dependent gain at delta in L5 relative to L2&3  
432 pyramidal cells being abolished using the  $I_h$  blocker ZD7288. Voltage-clamp data suggested this prominence  
433 of  $I_h$  in L5 pyramidal cells was due to increased channel number and not differences in kinetics of  $I_h$   
434 channels. Intriguingly, we found anecdotal evidence that  $I_h$  appears more prominent in L5 relative to L2&3  
435 putative GABAergic interneurons, and that this might contribute to enhanced resonant activity in these  
436 neurons.

437  
438 Third, while we identified numerous pyramidal cells displaying non-zero resonant peaks in each cortical  
439 layer, we found resonance at frequencies  $>2$ Hz to be a largely uncommon feature. This corresponds with  
440 previous reports finding cells, albeit rarely, exhibiting resonance at  $>4$ Hz in the deeper parts of L3<sup>4</sup> and in  
441 larger, thick-tufted neurons in L5<sup>3</sup>

442  
443 Fourth, we found a great degree of electrophysiological heterogeneity among pyramidal cells sampled  
444 within each cortical layer. Consistent with recent reports describing the variability in morpho-electric and  
445 transcriptomic subtypes of L2 and L3 pyramidal cells <sup>4,27,28</sup>, we found a similar and potentially greater  
446 amount of electrophysiological variability among human L5 pyramidal cells. Such biophysical variability  
447 amongst neurons of the same cell-type is an increasingly recognized and computationally important aspect  
448 of neural circuits <sup>44-46</sup>. Our sampling of L5 pyramidal neurons is consistent with recent transcriptomic  
449 evidence suggesting that the vast majority of excitatory neurons in human L5 MTG are IT projecting <sup>26</sup>.  
450 Another source of variability arises from the known dichotomy between L5 ET and IT projecting neurons,  
451 which have been extensively characterized in rodents <sup>29,41</sup>. This source of variance is less likely a contributor

452 to the biophysical variability we observe since IT cells make up only 0.6% of glutamatergic neurons in human  
453 L5 (Supplementary Fig.9). Thus, unlike a recent report <sup>3</sup> that targeted L5 thick-tufted neurons, the majority  
454 of the L5 neurons sampled here with their relatively high input resistances (>90 MΩ) suggests we recorded  
455 primarily from the abundant thin-tufted IT pyramidal cells. We note that disentangling these hypotheses  
456 requires further corroboration, and will likely require the use of emerging tools such as Patch-seq <sup>27</sup> to  
457 merge cell taxonomies along multiple modalities.

458 Given our findings of greater  $I_h$  in L5 neurons, we were initially surprised that a larger number of  
459 neurons did not demonstrate a peak in subthreshold resonance at frequencies >4Hz. For example, a  
460 previous report by Kalmbach et al. suggested that  $I_h$  contributes to prominent subthreshold resonance in  
461 deep L3 human pyramidal cells <sup>4</sup>. Similarly, somatic subthreshold resonance has also been reported in  
462 human L5 thick-tufted neurons <sup>3</sup>. In addition, previous work in rodents has shown that L5 pyramidal cells  
463 are endowed with subthreshold resonance <sup>47-50</sup>. However, our findings are not inconsistent with previous  
464 results in the human setting. In particular, the work of Kalmbach et al. reports notably few cells in L2&3  
465 exhibiting subthreshold resonance at >4Hz, as well as many cells exhibiting no resonant peak at all when  
466 held at a common membrane potential of -65mV <sup>4</sup>. Similarly, we note that while Beaulieu-Laroche et al.  
467 reported strong subthreshold resonance among L5 pyramidal cells, these recordings were intentionally  
468 targeted towards the largest cells in L5 (and are thus likely to reflect characterization of the rare ET cells  
469 <sup>3,26</sup>).

470 It is worth emphasizing that subthreshold resonance is a complex dynamic not dictated solely by the  
471 amount of  $I_h$  present in a cell, which likely explains the minor differences in proportions of resonant cells  
472 reported in our work and that of Kalmbach et al. <sup>4</sup>. In fact, interactions between  $I_h$  <sup>48</sup>, persistent Na<sup>+</sup> current  
473 ( $I_{NaP}$ ),  $K_{IR}$  (instantaneously activating, inwardly rectifying K<sup>+</sup> current) <sup>49</sup>, M-current <sup>21</sup> and passive properties  
474 <sup>50</sup> are all thought to influence this dynamic. Hippocampal oriens-lacunosum molecular (OLM) interneurons  
475 <sup>43</sup>, CA1 pyramidal cells, oriens-radiatum (OR) interneurons <sup>43</sup>, and inferior olivary neurons <sup>51</sup> are all examples  
476 of cells where subthreshold resonance is not solely and/or directly driven by  $I_h$ . When viewed in concert  
477 with our recent detailed computational investigation of the relationship between  $I_h$  and subthreshold  
478 resonance <sup>31</sup>, our current results serve to highlight that a prominent  $I_h$  is not always sufficient to drive  
479 subthreshold resonance. With subthreshold resonance not observed as a general feature of L5 pyramidal  
480 cells, we sought other biophysical features that might explain why L5 cells appear to drive interlaminar  
481 theta coherence. Recently, a putative “dynamic circuit motif” (DCM) <sup>20</sup> has been proposed to underlie the  
482 interlaminar nested delta-theta oscillations observed in rodents. This DCM posits intrinsically-bursting (IB)  
483 neurons in L5 neurons as central actors in generating deep layer activity that drives superficial theta  
484 oscillations <sup>52</sup>. Although the electrophysiological signature and experimental conditions studied in  
485 Carracedo et. al. were different to ours in human cortical slices <sup>9</sup>, it is instructive to relate our findings to  
486 what was observed in rat neocortex. Carracedo et. al. demonstrated that delta oscillations likely occur due  
487 to tonic drive to the dendrites of IB neurons in superficial layers <sup>52</sup>. This tonic drive causes the IB neurons  
488 to discharge bursts at delta frequencies (~2Hz). IB neurons are unique in that, in addition to their subcortical  
489 targets, they primarily synapse locally within deep layers on L5 RS IT neurons, unlike L5 RS neurons that  
490 project axons both locally and to L2&3 <sup>41,53,54</sup>. The RS neurons are thus driven by periodic barrages at delta  
491 frequencies and discharge doublets with each IB burst, thus generating “theta” frequency output at double  
492 the L5 delta frequency, which is then transmitted to superficial layers. The sinks generated in the superficial  
493 layers thus occur at theta frequency, driving local excitability in L2&3 with the resultant increase in  
494 excitatory drive to L5 IB dendrites starting the cycle anew.

495 Our results demonstrating 4 and 8Hz peaks in  $G(f)$  for L5 RS neurons, interpreted in the context of the  
496 above findings by Carracedo et al., provides a plausible mechanism for the theta activity (~8Hz) we  
497 observed in vitro <sup>55</sup> and which is ubiquitously observed in the human brain <sup>17</sup>. It is important to note that

498 the theta generated by RS neurons described by Carracedo et al. arises from the doublet generated in  
499 response to each cycle of delta, and thus why theta (~4Hz) was twice the frequency of the observed delta  
500 (~2Hz) in their work. The double peak in  $G(f)$  we observe in human L5 RS neurons implies that RS neurons  
501 are tuned to both 4Hz and 8Hz activity, and not surprisingly the 8Hz peak in  $G(f)$  is similar to the frequency  
502 at which interlaminar coherence was observed in human slices<sup>9</sup>, and twice the frequency of the low  
503 frequency peak in  $G(f)$ . Our ZD data further supports this relationship between the delta and theta peaks,  
504 where the delta peak in  $G(f)$  in a different subset of neurons was ~5.5Hz, and the “theta” peak was at ~11Hz.  
505 That blocking  $I_h$  abolished the delta peak suggests that  $I_h$  tunes L5 RS neurons to track IB output, which in  
506 turn generates theta (double the frequency of delta) output. Interpreted together, our frequency  
507 dependent gain and ZAP results suggest that  $I_h$  may not be a direct “cause” of cortical oscillations at theta  
508 (~8Hz), but rather tune RS cells to follow with great fidelity the IB output at delta (see Supplementary Fig.  
509 10 for this dynamic circuit motif).

510 An obvious difference between our previous human slice work<sup>9</sup> and that of Carracedo et al. is that we  
511 observed robust deep layer theta, although theta was still more prominent in the superficial layers. One  
512 possible explanation is that it has been shown that in human L2&3, a single action potential generates long  
513 lasting reverberant activity through rebound excitation that lasts an order of magnitude longer than in the  
514 rodent<sup>7</sup>. Thus, it is possible that such reverberant activity as well exists in L5 resulting in greater gain in  
515 local L5 cortical circuits that amplifies theta activity through both synaptic activation, and the theta peak in  
516  $G(f)$ . This conjecture is further supported by our observation that putative L5 interneurons demonstrate  
517 greater rebound depolarization than L2&3 neurons, and thus are likely able to amplify network activity  
518 within L5 potentially beyond what was observed in L2&3<sup>7</sup>. Future experiments are needed to explore if  
519 human cortical circuitry is arranged like that of the rodent, specifically as it relates to inter- and intralaminar  
520 connectivity.

521 It bears acknowledging that experimental limitations might have influenced our observation of  
522 subthreshold resonance. The increased density of the HCN channel in dendrites may result in resonance  
523 being observed better in the dendrites compared to the soma<sup>3</sup>, and despite best practice controls the  
524 possibility remains that truncated dendrites might affect resonance. Truncation of layer 5 pyramidal cell  
525 dendrites is a common and unavoidable issue due to longer apical dendrite length in the human neocortex  
526 (2mm)<sup>1,3</sup>. However, there is strong evidence for increased dendritic compartmentalization in large human  
527 neurons with distal inputs attenuating strongly towards soma<sup>3</sup>, and one would expect this effect to mitigate  
528 any effects of dendritic truncation on subthreshold resonance.

529 An important caveat when interpreting these findings is that these data are exclusively collected from  
530 neurosurgical patients undergoing surgery for drug-resistant epilepsy or for resection of brain tumors. We  
531 have been careful to only record from unaffected (non-epileptogenic) neocortical tissue. Nevertheless, it is  
532 unclear how these diseases (or their pharmacological treatment regimes) might contribute to  
533 compensatory changes at the level of cortical neuron physiology. Notwithstanding that epilepsy patients  
534 represent the primary source of viable human tissue for in vitro human studies<sup>1,3,4,26</sup>, our data is  
535 comparable to these human cell-typing efforts, since our inclusion criteria for our samples is consistent  
536 with these human studies. Additionally, by comparing our findings to analogous human neuronal datasets  
537 collected by other groups, we are confident our results are comparable to similar human cell-type  
538 characterizations. Lastly the most ubiquitous source of tissue from this study (MTG of epilepsy patients)  
539 demonstrates seeming transcriptomic “normalcy” when compared to post-mortem specimens from the  
540 MTG<sup>26</sup>.

541 This report reflects one of the largest studies of the electrophysiological diversity of human neocortical  
542 pyramidal cells to date, contributing to our growing understanding of human L5 pyramidal cells<sup>3</sup> and



543 serving to put the unique characteristics of these neurons into context with the better understood  
544 superficial layer pyramidal cells. Specifically, our unbiased sampling strategy of L5 cells complements the  
545 targeted characterization of large, thick-tufted L5 human pyramidal cells recently reported<sup>3</sup>. Given the rare  
546 opportunity to perform experiments in live human tissue, our work also represents an extremely valuable  
547 opportunity to compare findings with the limited existing literature on electrophysiological properties of  
548 human cortical neurons.

549 Moving forward, it will be essential to reconcile these electrophysiological and morphological data with  
550 the emerging consensus of neocortical cell type diversity based on single-cell transcriptomics<sup>3,4,26,56</sup> and  
551 how these features contribute to the unique emergent properties of human cortical circuits. Furthermore,  
552 little is known about the connectivity within human cortical circuits: is human inter- and intra-laminar  
553 connectivity similar to rodents, and how do cellular properties contribute to the signatures observed in  
554 meso- and macroscopic recordings? Answering these questions will require multi-scale inquiries of human  
555 cortical micro-circuits and *in silico* experiments to understand the divergent properties of human circuits,  
556 with the tools for such inquiries only now becoming available.

## 557 Methods

### 558 Human brain slice preparation

559 Written informed consent was obtained from all study participants to use their tissue as well as to  
560 share the acquired electrophysiological data and anonymized demographic information – including age,  
561 sex, years of seizure, diagnosis, and antiepileptic drug treatment – as stated in the research protocol. In  
562 accordance with the Declaration of Helsinki, approval for this study was received by the University Health  
563 Network Research Ethics board. Sixty-one patients, age ranging between 19 to 63 years (Mean age: 37.1 ±  
564 1.8), underwent a standard anterior temporal lobectomy (ATL)<sup>57</sup> or tumor resection from the frontal or  
565 temporal lobe<sup>58,59</sup> under general anesthesia using volatile anesthetics.

566 The surgery involved resecting the first 4.5 cm of neocortex using sharp dissection and local cooling  
567 with ~4°C TissueSol®. Immediately following surgical resection, the cortical block was submerged in an ice-  
568 cold (~4°C) cutting solution that was continuously bubbled with 95% O<sub>2</sub>-5% CO<sub>2</sub> containing (in mM) sucrose  
569 248, KCl 2, MgSO<sub>4</sub>·7H<sub>2</sub>O 3, CaCl<sub>2</sub>·2H<sub>2</sub>O 1, NaHCO<sub>3</sub> 26, NaH<sub>2</sub>PO<sub>4</sub>·H<sub>2</sub>O 1.25, D-glucose 10. The osmolarity was  
570 adjusted to 300-305 mOsm. The total duration, including slicing and transportation, was kept to a maximum  
571 of 20 minutes<sup>59</sup>. Transverse brain slices (400 μm) were obtained using a vibratome (Leica 1200 V) in cutting  
572 solution. Tissue slicing was performed perpendicular to the pial surface to ensure that pyramidal cell  
573 dendrites were minimally truncated<sup>4,58</sup>. The cutting solution was the same as used for transport of tissue  
574 from operation room to the laboratory. After sectioning, the slices were incubated for 30 min at 34°C in  
575 standard artificial cerebrospinal fluid (aCSF) (in mM): NaCl 123, KCl 4, CaCl<sub>2</sub>·2H<sub>2</sub>O 1, MgSO<sub>4</sub>·7H<sub>2</sub>O 1, NaHCO<sub>3</sub>  
576 26, NaH<sub>2</sub>PO<sub>4</sub>·H<sub>2</sub>O 1.2, and D-glucose 10, pH 7.40. All aCSF and cutting solutions were continuously bubbled  
577 with carbogen gas (95% O<sub>2</sub>-5% CO<sub>2</sub>) and had an osmolarity of 300-305 mOsm. Following this incubation,  
578 the slices were maintained in standard aCSF at 22–23 °C for at least 1 hour, until they were individually  
579 transferred to a submerged recording chamber.

580 For a subset of experiments designed to assess frequency dependent gain, slices were prepared using  
581 the NMDG protective recovery method<sup>60</sup>. The slicing and transport solution was composed of (in mM):  
582 NMDG 92, KCl 2.5, NaH<sub>2</sub>PO<sub>4</sub> 1.25, NaHCO<sub>3</sub> 30, HEPES 20, Glucose 25, Thiourea 2, Na L-ascorbate 5, Na-  
583 Pyruvate 3, CaCl<sub>2</sub>·4H<sub>2</sub>O 0.5, and MgSO<sub>4</sub>·7H<sub>2</sub>O 10. The pH of NMDG solution was adjusted to 7.3-7.4 using  
584 hydrochloric acid and the osmolarity was 300-305 mOsm. Before transport and slicing, the NMDG solution  
585 was carbogenated for 15 min and chilled to 2-4°C. After slices were cut (as described above), they were  
586 transferred to a recovery chamber filled with 32-34°C NMDG solution, and continuously bubbled with 95%



587 O<sub>2</sub> 5% CO<sub>2</sub>. After 12 minutes, the slices were transferred to an incubation solution containing (in mM): NaCl  
588 92, KCl 2.5, NaH<sub>2</sub>PO<sub>4</sub>·H<sub>2</sub>O 1.25, NaHCO<sub>3</sub> 30, HEPES 20, Glucose 25, Thiourea 2, Na L-ascorbate 5, Na-  
589 Pyruvate 3, CaCl<sub>2</sub>·4H<sub>2</sub>O 2, and MgSO<sub>4</sub>·7H<sub>2</sub>O 2. The solution was continuously bubbled with 95% O<sub>2</sub> -5% CO<sub>2</sub>.  
590 After 1 hour incubation at room temperature, slices were transferred to a recording chamber and  
591 continuously perfused with aCSF containing (in mM): NaCl 126, KCl 2.5, NaH<sub>2</sub>PO<sub>4</sub>·H<sub>2</sub>O 1.25, NaHCO<sub>3</sub> 26,  
592 Glucose 12.6, CaCl<sub>2</sub>·2H<sub>2</sub>O 2, and MgSO<sub>4</sub>·7H<sub>2</sub>O 1. We emphasize that these experiments were performed  
593 with excitatory (APV 50 μM, Sigma; CNQX 25 μM, Sigma) and inhibitory (Bicuculline 10 μM, Sigma; CGP-  
594 35348 10 μM, Sigma) synaptic activity blocked. These blockers are only used in these experiments,  
595 highlighted in Figure 5.

## 596 Electrophysiology recordings and intrinsic physiology feature analysis

597 For recordings, slices were transferred to a recording chamber mounted on a fixed-stage upright  
598 microscope (Olympus BX<sub>51</sub>WI upright microscope; Olympus Optical Co., NY, USA and Axioskop 2 FS MOT;  
599 Carl Zeiss, Germany). Slices were continually perfused at 4 ml/min with standard aCSF at 32–34°C. Cortical  
600 neurons were visualized using an IR-CCD camera (IR-1000, MTI, USA) with a 40x water immersion objective  
601 lens. Using the IR-DIC microscope, the boundary between layer 1 and 2 was easily distinguishable in terms  
602 of cell density. Below L2, the sparser area of neurons (L3) were followed by a tight band of densely packed  
603 layer 4 (L4) neurons. L4 was followed by a decrease in cell density (L5). In general, we did not annotate  
604 different neurons recorded from L2 versus those recorded from L3, except when explicitly mentioned. In  
605 this study, we use the terminology “L2&3” to highlight that these layers are distinct in the human cortex,  
606 rather than indistinguishable as in the rodent cortex. Cells specifically targeted in deep L3 are further  
607 distinguished by being denoted as coming from “L3c”.

608 Patch pipettes (3–6 MΩ resistance) were pulled from standard borosilicate glass pipettes (thin-wall  
609 borosilicate tubes with filaments, World Precision Instruments, Sarasota, FL, USA) using a vertical puller  
610 (PC-10, Narishige). Pipettes were filled with intracellular solution containing (in mM): K-gluconate 135; NaCl  
611 10; HEPES 10; MgCl<sub>2</sub> 1; Na<sub>2</sub>ATP 2; GTP 0.3, pH adjusted with KOH to 7.4 (290–309 mOsm). In a subset of  
612 experiments the pipette solution also contained biocytin (3–5%). Whole-cell patch-clamp recordings were  
613 obtained using a Multiclamp 700A amplifier, Axopatch 200B amplifier, pClamp 9.2 and pClamp 10.6 data  
614 acquisition software (Axon instruments, Molecular Devices, USA). Subsequently, electrical signals were  
615 digitized at 20 kHz using a 1320X digitizer. The access resistance was monitored throughout the recording  
616 (typically between 8–25 MΩ), and neurons were discarded if the access resistance was >25 MΩ. The liquid  
617 junction potential was calculated to be -10.8 mV and was not corrected.

618 Data were analysed off-line using Clampfit 10.7, Python, MATLAB, and R software. The resting  
619 membrane potential (RMP) was measured after breaking into the cell (IC=0). The majority of the intrinsic  
620 electrophysiological features reported here were calculated using the Python IPFX toolbox  
621 (<https://github.com/AllenInstitute/ipfx/>) with default parameter settings<sup>61</sup>. The input resistance and  
622 membrane time constant were calculated using hyperpolarizing sweeps between -50 to -200pA. Single  
623 action potential features, the like action potential threshold, peak, width at half-max, and the upstroke-  
624 downstroke ratio, were calculated using the first spike at rheobase. The adaptation index, average firing  
625 rate, inter-spike intervals (first, mean, median, coefficient of variation) were defined using the “hero”  
626 sweep with default parameters (defined as the sweep between 39 to 61 pA greater than the rheobase).  
627 Sag amplitude and sag ratio were defined in response to hyperpolarizing current pulses (600ms duration,  
628 0 to -400 pA, 50 pA steps). The sag ratio was calculated as the difference between the minimum value and  
629 the steady state divided by peak deflection during hyperpolarization current injection. The rebound  
630 depolarization amplitude was calculated as the difference between the steady state voltage and the  
631 maximum depolarization potential. We also observed the presence or absence of rebound spiking following

632 the injection of hyperpolarization current steps (-400 pA). The  $I_h$  blocker ZD7288 (10  $\mu$ M, Sigma Aldrich)  
633 was applied to confirm pharmacological evidence for  $I_h$ .

634 Bursting neurons were defined as those where the instantaneous frequency (determined by the first  
635 inter-spike interval at rheobase) was greater than 75Hz. We identified putative interneurons within our  
636 dataset by manually assessing each cell's maximum firing rates, spike widths, and after-hyperpolarization  
637 amplitudes. Putative interneurons that we identified using these criteria typically had spike half-widths less  
638 than <1 ms, afterhyperpolarization amplitudes greater than 10mV, and maximum firing rates >75Hz<sup>62</sup>. We  
639 note that one limitation of this intrinsic feature-based identification criteria is the relative inability to  
640 identify VIP and other CGE (Caudal Ganglionic Eminence) -derived interneurons using intrinsic  
641 electrophysiological criteria alone<sup>63</sup>.

#### 642 Voltage-clamp characterisation of $I_h$ and $I_{tail}$

643 To characterize  $I_h$ , 600 ms-long voltage-clamp steps were used in -10mV increments, down to -140mV  
644 from a holding potential of -60mV. In order to measure  $I_h$  amplitude, the difference between the steady  
645 state at the end of the holding potential and the maximum current was determined. The  $I_{tail}$  was quantified  
646 as the difference between peak amplitude of residual current at the end of each holding potential and the  
647 steady state current from holding potentials of -140 to -60mV. A single or double-exponential model, fitted  
648 to the various currents recorded, was used to calculate the time constants of  $I_h$  in order to determine the  
649 kinetics of  $I_h$ . To measure the voltage sensitivity of  $I_h$  in L2&3 and L5 pyramidal cells, the membrane  
650 potential evoking half-maximal activation of  $I_h$  ( $V_{50}$ ) was obtained by fitting the  $I_h$  activation to a Boltzmann  
651 sigmoid function using GraphPad 6 (GraphPad, San Diego, CA, USA). In experiments to quantify  $I_h$ , the  
652 sodium channel blocker tetrodotoxin (1  $\mu$ M; Alomone Labs) to block voltage gated sodium currents,  $CoCl_2$   
653 (2mM; Sigma-Aldrich) to block voltage-sensitive calcium currents, and  $BaCl_2$  (1mM; Sigma-Aldrich) to block  
654 inwardly rectifying potassium current were added to the bath solution. We note that space clamp issues  
655 limit the precise quantification of the  $I_h$ <sup>30</sup>.

#### 656 Subthreshold resonance and spike probability analyses

657 To assess subthreshold and suprathreshold resonance properties, a frequency modulated sine wave  
658 current input (ZAP/chirp) was generated ranging from 1 to 20Hz, lasting 20 seconds<sup>33</sup> with a sampling rate  
659 of 10kHz. This current waveform was then injected using the custom waveform feature of Clampex 9.2 and  
660 Clampex 10.2 (Axon Instruments, Molecular Devices, USA). The subthreshold current amplitude was  
661 adjusted to the maximal current that did not elicit spiking.

662 For determining subthreshold resonance, only trials without spiking were utilized for analysis. Analyses  
663 were performed using in house Python scripts adapted from Kalmbach et al.<sup>4</sup>. The impedance profile of  
664 the cell was computed by taking the ratio of the voltage over current in the frequency domain obtained  
665 with the fast Fourier transform. Window averaging was then applied to smooth the impedance profile of  
666 the cell. The impedance profiles were then averaged over several trials (up to five) to obtain the mean  
667 impedance profile of the cell. The frequency point with the highest impedance is the center frequency  
668 while the frequency point with half of the center impedance is the 3dB cut-off frequency. Resonant neurons  
669 were defined as those with resonant frequencies greater than 0.5Hz, the lowest frequency tested here.

670 To analyze responses to suprathreshold frequency-modulated sinusoidal current, spiking probability as  
671 a function of input frequency was assessed using suprathreshold current stimulation. The suprathreshold  
672 current was set by gradually increasing the amplitude of the ZAP function input by adjusting the gain of the  
673 stimulus until the first spike was elicited. Ten traces per cell were utilized to obtain the probability of spiking  
674 as a function of frequency. Since the instantaneous frequency is known from the current input, each action  
675 potential could be assigned a frequency at which it occurred. To create the spike probability density

676 function for each cell type, the frequencies at which individual spikes occurred were pooled, a histogram  
677 generated and divided by the total number of spikes. To compare spike probability density functions  
678 between cell types the distributions were compared using a two-sample Kolmogorov-Smirnov test  
679 (`kstest2.m`).

## 680 Multi-variate electrophysiological feature analysis

681 We used a dimensionality reduction approach to visualize similarities in recorded neurons according  
682 to multi-variate correlations in measured electrophysiology features. We specifically used the uniform  
683 manifold approximation (UMAP) function and library implemented in R with default parameter settings<sup>42</sup>.  
684 We defined each recorded cell using feature vectors constructed from a set of 14 electrophysiological  
685 features that were reliably calculated in most characterized neurons. We specifically used the following  
686 subthreshold features: resting membrane potential, input resistance, membrane time constant, sag ratio,  
687 sag amplitude. We additionally used the following suprathreshold features of the first action potential at  
688 rheobase: AP threshold, amplitude, half-width, upstroke-downstroke ratio, after-hyperpolarization  
689 amplitude, rheobase, and latency to first spike. We also used the following spike train features: slope of FI  
690 curve and average spiking rate at the hero sweep stimulus.

## 691 Frequency Dependent Gain

692 Following a similar methodology of Higgs et al.<sup>38</sup>, frequency dependent gain was computed using 30  
693 trials (inter-trial interval = 20 seconds) of a 2.5 second duration current injection stimulus of frozen white  
694 noise convolved with a 3ms square function<sup>64</sup>. This measure identifies the likelihood of the neuron spiking  
695 in phase with an oscillatory input that is small relative to the overall input to the cell, distinct from analysis  
696 of the neuron's activity in response to a suprathreshold ZAP input<sup>38</sup>. The amplitude (a.k.a. variance) of the  
697 current injection stimulus was scaled to elicit spike rates of above 5Hz, the typical firing rate for cortical  
698 pyramidal cells<sup>65</sup>. In addition to increasing the noise variance, a steady amount of DC current was required  
699<sup>38</sup> to elicit spiking, which was delivered as various amplitude steps were added to the noisy current input.  
700 Peaks detected in the voltage time series with overshoot greater than 0mV were taken to be the occurrence  
701 of an action potential. The time varying firing rate  $r(t)$  was given by:

$$702 \quad r(t) = \begin{cases} \frac{1}{\Delta t} & \text{Where spike detected} \\ 0 & \text{Where no spike detected} \end{cases} \quad (1)$$

703 The stimulus–response correlation ( $c_{sr}$ ) and the stimulus autocorrelation ( $c_{ss}$ ) were calculated in the  
704 following fashion:

$$705 \quad c_{sr}(\tau) = \langle s(t)r(t + \tau) \rangle \quad (2)$$

$$706 \quad c_{ss}(\tau) = \langle s(t)s(t + \tau) \rangle \quad (3)$$

707 where  $\tau$  is the time difference, and the stimulus  $s(t)$  is  $I_{\text{noise}}(t)$ . After windowing the  $c_{sr}(\tau)$  and  $c_{ss}(\tau)$   
708 functions (see below), the complex Fourier components  $C_{sr}(f)$  and  $C_{ss}(f)$  were obtained, and the frequency-  
709 dependent gain and the average phase shift were calculated with  $\sigma = 1/f$ , in order to ensure the spectral  
710 estimates were not dominated by noise. The gain ( $G(f)$ ) and the phase ( $\varphi(f)$ ) are:

$$711 \quad G(f) = \frac{|C_{sr}(f)|}{|C_{ss}(f)|} \quad (4)$$

$$712 \quad \varphi(f) = \text{atan} \frac{[\text{Im}[C_{sr}(f)]]}{[\text{Re}[C_{sr}(f)]]} \quad (5)$$

713 where **Re** and **Im** refer to the real and imaginary parts of each Fourier component.  $\varphi(f)$  was then  
714 corrected using the peak time ( $\tau_{delay}$ ) of  $c_{sr}(\tau)$ <sup>38</sup>.

715 For statistical testing, individual gains or  $G(f)$ s for each cell (30 trials/cell) from neurons with spike rates  
716 above 5Hz were pooled for each cell type. To compare between cell types, Mann-Whitney U (`ranksum.m`)  
717 was used to obtain a  $p$ -value at each frequency (2-100Hz in 0.2Hz steps). The  $p$ -values were the false  
718 discovery rate corrected with an alpha = 0.01<sup>40</sup>.

## 719 [Histological methods](#)

720 During electrophysiological recording, biocytin (3-5 mg/ml) was allowed to diffuse into the patched  
721 neuron; after 20-45 minutes, the electrodes were slowly retracted under visual guidance to maintain the  
722 quality of the seal and staining. The slices were left for another 10-15 minutes in the recording chamber to  
723 washout excess biocytin from extracellular space, then transferred to 4% paraformaldehyde and kept at  
724 4°C for 24 hours.

725 Subsequently, the slices were washed and transferred into PBS solution (0.1 mM). To reveal biocytin,  
726 slices were incubated in blocking serum (0.5 % Bovine serum albumin (BSA), 0.5 % milk powder) and 0.1%  
727 Triton X-100 in PBS for 1 hour at room temperature. Finally, slices were incubated with streptavidin-  
728 conjugated Alexa Fluor 594 (1:300) overnight at 4°C. Then slices were rinsed with PBS and mounted on the  
729 slide using moviol (Sigma-Aldrich). Imaging was done using a Zeiss LSM710 Multiphoton microscope.  
730 Reconstructions were performed using IMARIS software (Bitplane, Oxford instrument company).

## 731 [Statistical analyses](#)

732 Statistical analyses and plotting were performed using GraphPad Prism 6. Data are presented in the  
733 text as mean  $\pm$  SD unless otherwise noted. Unless stated otherwise, a standard threshold of  $p < 0.05$  was  
734 used to report statistically significant differences. One-Way ANOVA post hoc with Dunn's multiple  
735 comparison test were used for statistical comparison. The non-parametric Mann-Whitney test was used to  
736 determine statistical differences between two groups. Wilcoxon matched-pairs signed rank test used for  
737 paired comparison between two groups.

## 738 [Data Availability](#)

739 Source data are provided with this paper in the Supplementary Materials.

## 740 [Code Availability](#)

741 Computational code for custom analyses are available at the following GitHub repositories:  
742 [https://github.com/stripathy/valiante\\_ih](https://github.com/stripathy/valiante_ih) (R) and [https://github.com/stripathy/valiante\\_lab\\_abf\\_process](https://github.com/stripathy/valiante_lab_abf_process)  
743 (Python).

744

745

## 746 [References](#)

- 747 1 Mohan, H. *et al.* Dendritic and axonal architecture of individual pyramidal neurons across layers of  
748 adult human neocortex. *Cerebral Cortex* **25**, 4839-4853 (2015).
- 749 2 Eyal, G. *et al.* Unique membrane properties and enhanced signal processing in human neocortical  
750 neurons. *Elife* **5**, e16553 (2016).

- 751 3 Beaulieu-Laroche, L. *et al.* Enhanced dendritic compartmentalization in human cortical neurons.  
752 *Cell* **175**, 643-651. e614 (2018).
- 753 4 Kalmbach, B. E. *et al.* h-Channels Contribute to Divergent Intrinsic Membrane Properties of  
754 Supragranular Pyramidal Neurons in Human versus Mouse Cerebral Cortex. *Neuron* **100**, 1194-  
755 1208. e1195 (2018).
- 756 5 Boldog, E. *et al.* Transcriptomic and morphophysiological evidence for a specialized human cortical  
757 GABAergic cell type. *Nature neuroscience* **21**, 1185-1195 (2018).
- 758 6 Deitcher, Y. *et al.* Comprehensive morpho-electrotonic analysis shows 2 distinct classes of L2 and  
759 L3 pyramidal neurons in human temporal cortex. *Cerebral Cortex* **27**, 5398-5414 (2017).
- 760 7 Molnár, G. *et al.* Complex events initiated by individual spikes in the human cerebral cortex. *PLoS*  
761 *biology* **6**, e222 (2008).
- 762 8 Verhoog, M. B. *et al.* Mechanisms underlying the rules for associative plasticity at adult human  
763 neocortical synapses. *Journal of Neuroscience* **33**, 17197-17208 (2013).
- 764 9 Florez, C. *et al.* In vitro recordings of human neocortical oscillations. *Cerebral cortex* **25**, 578-597  
765 (2015).
- 766 10 Goriounova, N. A. *et al.* Large and fast human pyramidal neurons associate with intelligence. *Elife*  
767 **7**, e41714 (2018).
- 768 11 Skinner, F. K. Cellular-based modeling of oscillatory dynamics in brain networks. *Current opinion in*  
769 *neurobiology* **22**, 660-669 (2012).
- 770 12 Womelsdorf, T., Ardid, S., Everling, S. & Valiante, T. A. Burst firing synchronizes prefrontal and  
771 anterior cingulate cortex during attentional control. *Current Biology* **24**, 2613-2621 (2014).
- 772 13 Markram, H. *et al.* Reconstruction and simulation of neocortical microcircuitry. *Cell* **163**, 456-492  
773 (2015).
- 774 14 Einevoll, G. T. *et al.* The Scientific Case for Brain Simulations. *Neuron* **102**, 735-744 (2019).
- 775 15 Ruzzo, E. K. & Geschwind, D. H. Schizophrenia genetics complements its mechanistic  
776 understanding. *Nature neuroscience* **19**, 523 (2016).
- 777 16 Vigo, D. V., Kestel, D., Pendakur, K., Thornicroft, G. & Atun, R. Disease burden and government  
778 spending on mental, neurological, and substance use disorders, and self-harm: cross-sectional,  
779 ecological study of health system response in the Americas. *The Lancet Public Health* **4**, e89-e96  
780 (2019).
- 781 17 Groppe, D. M. *et al.* Dominant frequencies of resting human brain activity as measured by the  
782 electrocorticogram. *Neuroimage* **79**, 223-233 (2013).
- 783 18 McGinn, R. J. & Valiante, T. A. Phase–amplitude coupling and interlaminar synchrony are correlated  
784 in human neocortex. *Journal of Neuroscience* **34**, 15923-15930 (2014).
- 785 19 von Nicolai, C. *et al.* Corticostriatal coordination through coherent phase-amplitude coupling.  
786 *Journal of Neuroscience* **34**, 5938-5948 (2014).
- 787 20 Womelsdorf, T., Valiante, T. A., Sahin, N. T., Miller, K. J. & Tiesinga, P. Dynamic circuit motifs  
788 underlying rhythmic gain control, gating and integration. *Nature neuroscience* **17**, 1031 (2014).
- 789 21 Hu, H., Vervaeke, K. & Storm, J. F. Two forms of electrical resonance at theta frequencies, generated  
790 by M-current, h-current and persistent Na<sup>+</sup> current in rat hippocampal pyramidal cells. *The Journal*  
791 *of physiology* **545**, 783-805 (2002).
- 792 22 Das, A. & Narayanan, R. Theta-frequency selectivity in the somatic spike-triggered average of rat  
793 hippocampal pyramidal neurons is dependent on HCN channels. *Journal of neurophysiology* **118**,  
794 2251-2266 (2017).
- 795 23 Neuhoff, H., Neu, A., Liss, B. & Roeper, J. Ih channels contribute to the different functional  
796 properties of identified dopaminergic subpopulations in the midbrain. *Journal of Neuroscience* **22**,  
797 1290-1302 (2002).



- 798 24 Gastrein, P. *et al.* The role of hyperpolarization-activated cationic current in spike-time precision  
799 and intrinsic resonance in cortical neurons in vitro. *The Journal of physiology* **589**, 3753-3773  
800 (2011).
- 801 25 Herrmann, S., Schnorr, S. & Ludwig, A. HCN channels—Modulators of cardiac and neuronal  
802 excitability. *International journal of molecular sciences* **16**, 1429-1447 (2015).
- 803 26 Hodge, R. D. *et al.* Conserved cell types with divergent features in human versus mouse cortex.  
804 *Nature* **573**, 61-68 (2019).
- 805 27 Berg, J. *et al.* Human cortical expansion involves diversification and specialization of supragranular  
806 intratelencephalic-projecting neurons. *BioRxiv* (2020).
- 807 28 Ting, J. T. *et al.* A robust ex vivo experimental platform for molecular-genetic dissection of adult  
808 human neocortical cell types and circuits. *Scientific reports* **8**, 1-13 (2018).
- 809 29 Ramaswamy, S. & Markram, H. Anatomy and physiology of the thick-tufted layer 5 pyramidal  
810 neuron. *Frontiers in cellular neuroscience* **9**, 233 (2015).
- 811 30 Bar-Yehuda, D. & Korngreen, A. Space-clamp problems when voltage clamping neurons expressing  
812 voltage-gated conductances. *Journal of neurophysiology* **99**, 1127-1136 (2008).
- 813 31 Rich, S., Moradi Chameh, H., Sekulic, V., Valiante, T. A. & Skinner, F. K. Modeling Reveals Human–  
814 Rodent Differences in H-Current Kinetics Influencing Resonance in Cortical Layer 5 Neurons.  
815 *Cerebral Cortex*, doi:10.1093/cercor/bhaa261 (2020).
- 816 32 Hutcheon, B. & Yarom, Y. Resonance, oscillation and the intrinsic frequency preferences of  
817 neurons. *Trends in neurosciences* **23**, 216-222 (2000).
- 818 33 Hutcheon, B., Miura, R. M. & Putil, E. Subthreshold membrane resonance in neocortical neurons.  
819 *Journal of Neurophysiology* **76**, 683-697 (1996).
- 820 34 Richardson, M. J., Brunel, N. & Hakim, V. From subthreshold to firing-rate resonance. *Journal of*  
821 *neurophysiology* **89**, 2538-2554 (2003).
- 822 35 Rotstein, H. G. Frequency preference response to oscillatory inputs in two-dimensional neural  
823 models: a geometric approach to subthreshold amplitude and phase resonance. *The Journal of*  
824 *Mathematical Neuroscience* **4**, 11 (2014).
- 825 36 Rotstein, H. G. Spiking resonances in models with the same slow resonant and fast amplifying  
826 currents but different subthreshold dynamic properties. *Journal of computational neuroscience* **43**,  
827 243-271 (2017).
- 828 37 Rotstein, H. G. & Nadim, F. Frequency preference in two-dimensional neural models: a linear  
829 analysis of the interaction between resonant and amplifying currents. *Journal of computational*  
830 *neuroscience* **37**, 9-28 (2014).
- 831 38 Higgs, M. H. & Spain, W. J. Conditional bursting enhances resonant firing in neocortical layer 2–3  
832 pyramidal neurons. *Journal of Neuroscience* **29**, 1285-1299 (2009).
- 833 39 Yu, X. & Lewis, E. R. Studies with spike initiators: linearization by noise allows continuous signal  
834 modulation in neural networks. *IEEE Transactions on Biomedical Engineering* **36**, 36-43 (1989).
- 835 40 Benjamini, Y. & Hochberg, Y. Controlling the false discovery rate: a practical and powerful approach  
836 to multiple testing. *Journal of the royal statistical society. Series B (Methodological)*, 289-300  
837 (1995).
- 838 41 Baker, A. *et al.* Specialized subpopulations of deep-layer pyramidal neurons in the neocortex:  
839 bridging cellular properties to functional consequences. *Journal of Neuroscience* **38**, 5441-5455  
840 (2018).
- 841 42 McInnes, L., Healy, J., Saul, N. & Grossberger, L. UMAP: Uniform Manifold Approximation and  
842 Projection. *Journal of Open Source Software* **3**, 861, doi:10.21105/joss.00861 (2018).
- 843 43 Zemankovics, R., Káli, S., Paulsen, O., Freund, T. F. & Hájos, N. Differences in subthreshold  
844 resonance of hippocampal pyramidal cells and interneurons: the role of h-current and passive  
845 membrane characteristics. *The Journal of physiology* **588**, 2109-2132 (2010).



- 846 44 Padmanabhan, K. & Urban, N. N. Intrinsic biophysical diversity decorrelates neuronal firing while  
847 increasing information content. *Nature neuroscience* **13**, 1276 (2010).
- 848 45 Tripathy, S. J., Padmanabhan, K., Gerkin, R. C. & Urban, N. N. Intermediate intrinsic diversity  
849 enhances neural population coding. *Proceedings of the National Academy of Sciences* **110**, 8248-  
850 8253 (2013).
- 851 46 Marder, E. Variability, compensation, and modulation in neurons and circuits. *Proceedings of the*  
852 *National Academy of Sciences* **108**, 15542-15548 (2011).
- 853 47 Silva, L. R., Amitai, Y. & Connors, B. W. Intrinsic oscillations of neocortex generated by layer 5  
854 pyramidal neurons. *Science* **251**, 432 (1991).
- 855 48 Ulrich, D. Dendritic resonance in rat neocortical pyramidal cells. *Journal of neurophysiology* **87**,  
856 2753-2759 (2002).
- 857 49 Dembrow, N. C., Chitwood, R. A. & Johnston, D. Projection-specific neuromodulation of medial  
858 prefrontal cortex neurons. *Journal of Neuroscience* **30**, 16922-16937 (2010).
- 859 50 Schmidt, S. L., Dorsett, C. R., Iyengar, A. K. & Fröhlich, F. Interaction of intrinsic and synaptic  
860 currents mediate network resonance driven by layer V pyramidal cells. *Cerebral Cortex* **27**, 4396-  
861 4410 (2016).
- 862 51 Lampl, I. & Yarom, Y. Subthreshold oscillations and resonant behavior: two manifestations of the  
863 same mechanism. *Neuroscience* **78**, 325-341 (1997).
- 864 52 Carracedo, L. M. *et al.* A neocortical delta rhythm facilitates reciprocal interlaminar interactions via  
865 nested theta rhythms. *Journal of Neuroscience* **33**, 10750-10761 (2013).
- 866 53 Chagnac-Amitai, Y., Luhmann, H. J. & Prince, D. A. Burst generating and regular spiking layer 5  
867 pyramidal neurons of rat neocortex have different morphological features. *Journal of Comparative*  
868 *Neurology* **296**, 598-613 (1990).
- 869 54 Perin, R., Berger, T. K. & Markram, H. A synaptic organizing principle for cortical neuronal groups.  
870 *Proceedings of the National Academy of Sciences* **108**, 5419-5424 (2011).
- 871 55 Florez, C. *et al.* In vitro recordings of human neocortical oscillations. *Cerebral Cortex* **25**, 578-597  
872 (2013).
- 873 56 Habib, N. *et al.* Massively parallel single-nucleus RNA-seq with DroNc-seq. *Nature methods* **14**, 955  
874 (2017).
- 875 57 Mansouri, A., Fallah, A. & Valiante, T. A. Determining surgical candidacy in temporal lobe epilepsy.  
876 *Epilepsy research and treatment* **2012** (2012).
- 877 58 Kostopoulos, G., Drapeau, C., Avoli, M., Olivier, A. & Villemeure, J. G. Endogenous adenosine can  
878 reduce epileptiform activity in the human epileptogenic cortex maintained in vitro. *Neuroscience*  
879 *letters* **106**, 119-124 (1989).
- 880 59 Köhling, R. & Avoli, M. Methodological approaches to exploring epileptic disorders in the human  
881 brain in vitro. *Journal of neuroscience methods* **155**, 1-19 (2006).
- 882 60 Ting, J. T., Daigle, T. L., Chen, Q. & Feng, G. in *Patch-Clamp Methods and Protocols* 221-242  
883 (Springer, 2014).
- 884 61 Gouwens, N. W. *et al.* Classification of electrophysiological and morphological neuron types in the  
885 mouse visual cortex. *Nature neuroscience* **22**, 1182-1195 (2019).
- 886 62 Poorthuis, R. B. *et al.* Rapid neuromodulation of layer 1 interneurons in human neocortex. *Cell*  
887 *reports* **23**, 951-958 (2018).
- 888 63 Torres-Gomez, S. *et al.* Changes in the Proportion of Inhibitory Interneuron Types from Sensory to  
889 Executive Areas of the Primate Neocortex: Implications for the Origins of Working Memory  
890 Representations. *Cerebral Cortex* (2020).
- 891 64 Galán, R. F., Ermentrout, G. B. & Urban, N. N. Optimal time scale for spike-time reliability: theory,  
892 simulations, and experiments. *Journal of neurophysiology* **99**, 277-283 (2008).

893 65 Neske, G. T. & Connors, B. W. Distinct roles of SOM and VIP interneurons during cortical up states.  
894 *Frontiers in neural circuits* **10**, 52 (2016).

895

## 896 Acknowledgements

897 We are immensely grateful to our neurosurgical patients and their families for consenting to the use  
898 of their tissue samples for research. We thank Dr. Gelareh Zadeh and Dr. Mark Bernstein for their assistance  
899 in obtaining brain tissue samples and Victoria Barkley and Marjan Rafiee for assistance compiling  
900 demographic and chart information. We thank Sara Mahallati and Iliya Weisspapir for assistance in tissue  
901 preparation. We thank Brian Kalmbach for helpful conversations that informed our analysis of subthreshold  
902 resonance targeting of Layer 3c pyramidal cells. We thank Frances K Skinner, Etay Hay, Wesley Sacher, Dene  
903 Ringuette, Xiao Luo, and Jasmine Bell for their critical comments on the manuscript. We thank James  
904 Jonkman (Advanced Optical Microscopy Facility, University Health Network) for acquiring the two-photon  
905 images. We acknowledge generous support from the Centre for Addiction and Mental Health Discovery  
906 Fund, Krembil Brain Institute Fund, National Institute of Health, and Kavli Foundations.

## 907 Author Contributions

908 Conception or design of the experiments: HMC, TAV; Data collection: HMC, LW; Data analysis and  
909 interpretation: HMC, ST, SR, FC, TAV; Drafting the article HMC, ST, SR, TAV; Critical revision of the article:  
910 HMC, ST, SR, TAV; Final approval of the version to be published: HMC, SR, LW, FC, LZ, PLC, ST, TAV.

## 911 Competing Interest

912 The authors declare no competing interests.

913

## Supplementary Information

### Diversity amongst human cortical pyramidal neurons revealed via their sag currents and frequency preferences

Homeira Moradi Chameh<sup>1</sup>, Scott Rich<sup>1</sup>, Lihua Wang<sup>1</sup>, Fu-Der Chen<sup>2,3</sup>, Liang Zhang<sup>1,4</sup>, Peter L. Carlen<sup>1,4,5</sup>, Shreejoy J. Tripathy<sup>6,7,8†</sup>, Taufik A. Valiante<sup>1,2,5,7,9\*\*</sup>

<sup>1</sup>Krembil Brain Institute, University Health Network, 60 Leonard Street, Toronto, ON, Canada, M5T2S8.

<sup>2</sup>Department of Electrical and Computer Engineering, University of Toronto, 10 King's College Rd, Toronto, ON, Canada, M5S 3G8. <sup>3</sup>Max Planck Institute of Microstructure Physics, Weinberg 2, 06120, Halle, Germany.

<sup>4</sup>Departments of Medicine & Physiology, University of Toronto, King's College Circle, Medical Science Building, Toronto, ON, Canada, M5S 1A8. <sup>5</sup>Institute of Biomedical Engineering, University of Toronto, Rosebrugh Building, 164 College Street, Toronto, ON, Canada, M5S 3G9. <sup>6</sup>Krembil Centre for Neuroinformatics, Centre for Addiction and Mental Health, 250 College Street, Toronto, ON, Canada, M5T 1R8. <sup>7</sup>Institute of Medical Sciences, University of Toronto, King's College Circle, Medical Science Building, Toronto, ON, Canada, M5S 1A8. <sup>8</sup>Department of Psychiatry, University of Toronto, 250 College Street, Toronto, ON, Canada, M5T 1R8. <sup>9</sup>Department of Surgery, Division of Neurosurgery, University of Toronto, Stewart Building, 149 College Street, Toronto, ON, Canada. M5T 1P5.

†These authors contributed equally.

\* [taufik.valiante@uhn.ca](mailto:taufik.valiante@uhn.ca)

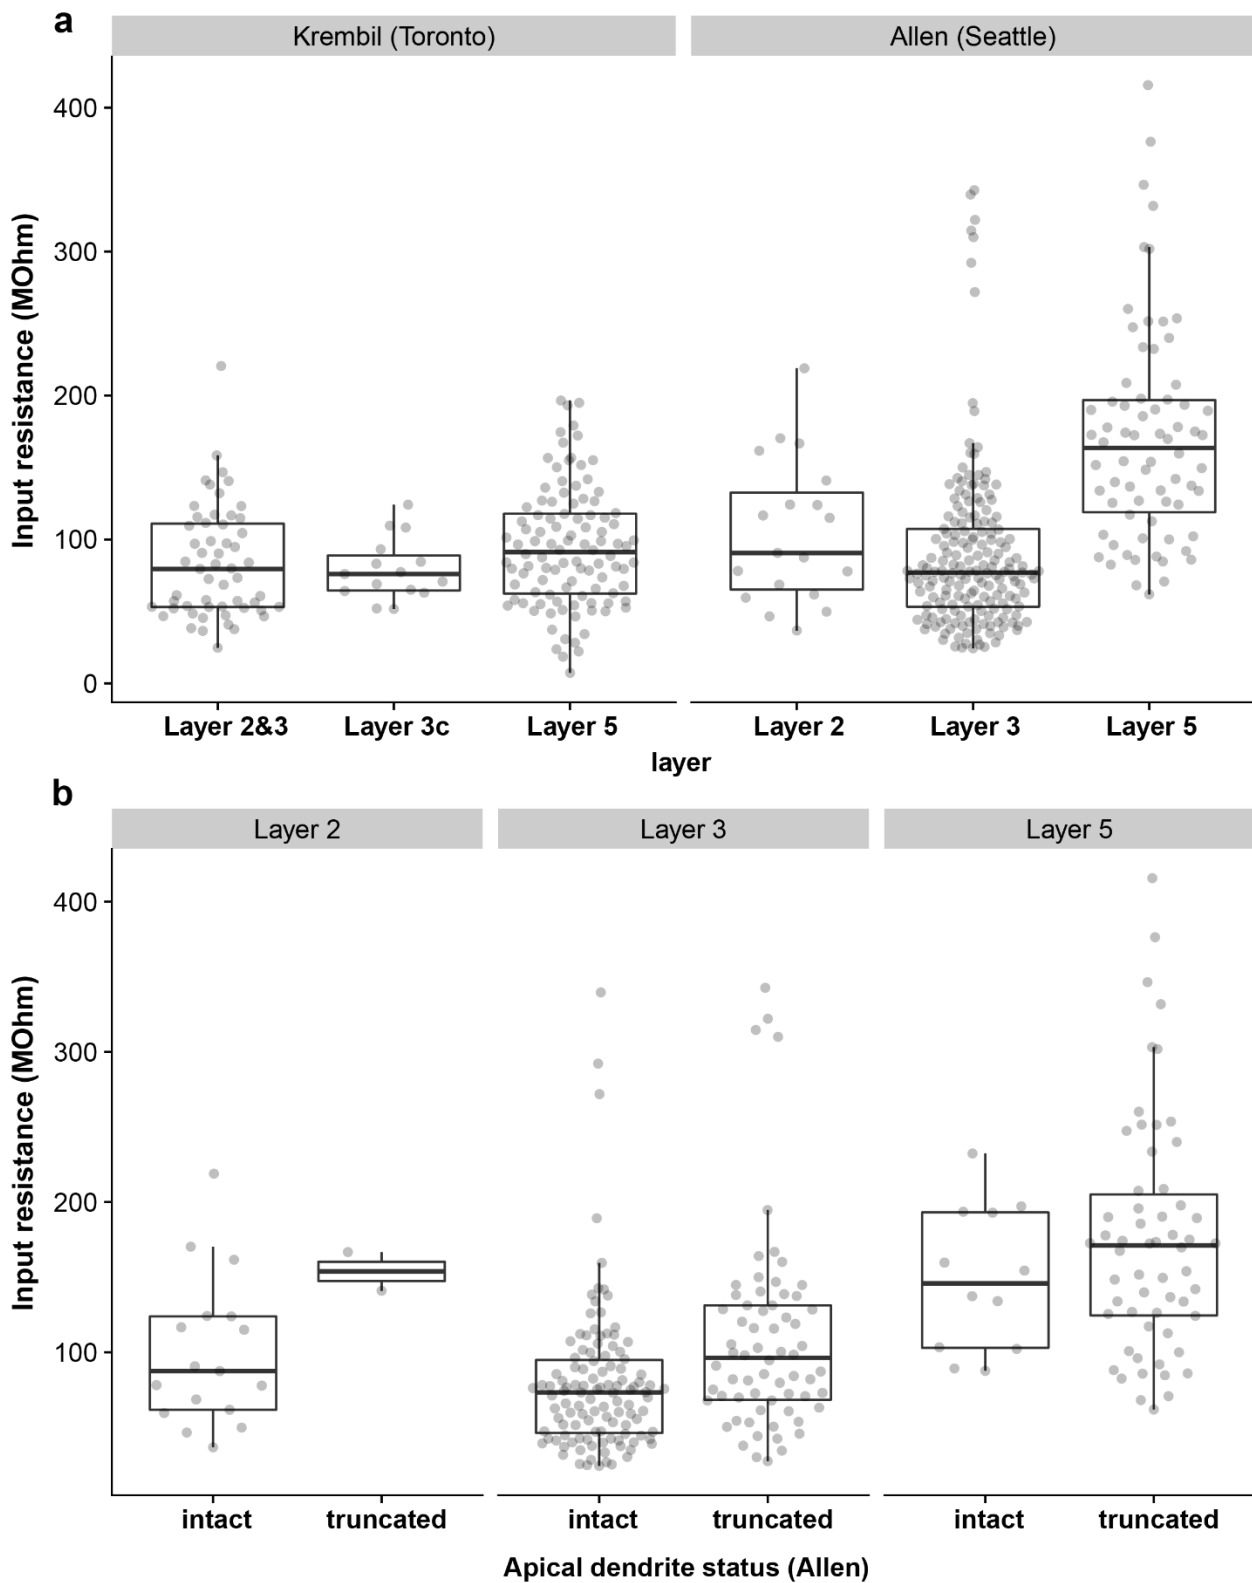

**Supplementary Figure 1: Comparison of input resistance measurements in human cortical pyramidal cells collected from the Krembil Brain Institute and the Allen Institute.** **a** Input resistance measurements from Krembil Brain Institute cohort (left, n = 56, 15, 105 for L2&3, L3c, L5, respectively) and Allen Institute cohort (right, n = 19, 181, 70 for L2, L3, L5, respectively). Note the trend of increased input resistances in L5 pyramidal cells relative to L2&3 neurons. **b** Same as right panel of a, but data have been grouped by whether the apical dendrite is intact or truncated (L2, n = 17 intact, 2 truncated; L3, 115 intact, 66 truncated; L5, 12 intact, 58 truncated). According to the Allen Institute's documentation, an apical dendrite is "intact" if the entire length of the primary dendrite was contained within the thickness of the slice and "truncated" if the primary dendritic branch was cut off at either slice surface. While dendrite truncation tends to increase input resistances, the overall relationship that input resistances in L2&3 are smaller than in L5 holds for neurons with confirmed intact primary dendrites. Boxplots denote interquartile range and whiskers denote data range excluding outliers. Source data are provided as a Source Data file.

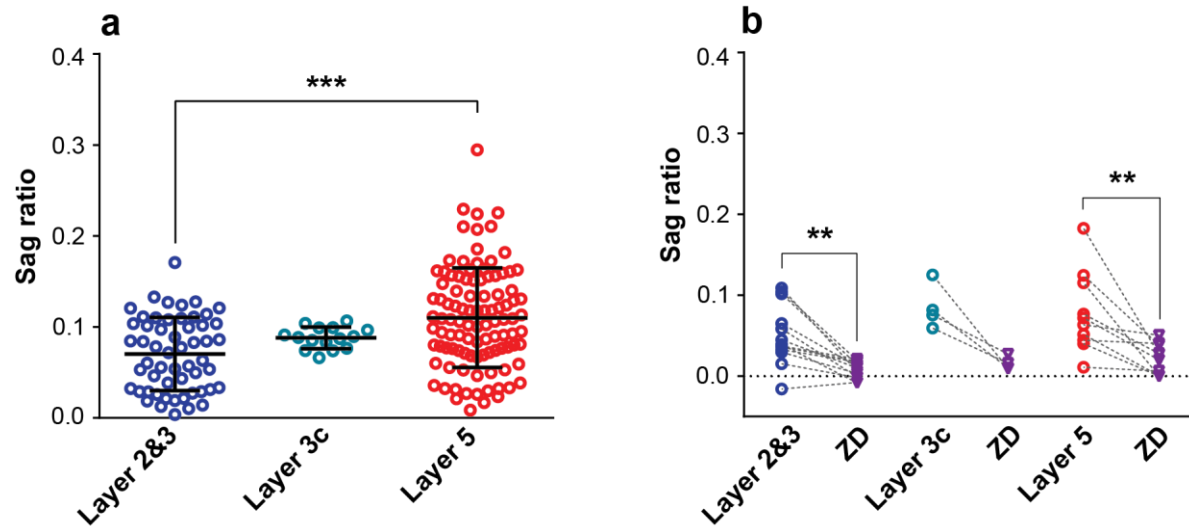

Supplementary Figure 2: Sag differences between cortical layers are robust to normalizing for input resistance differences using the dimensionless sag ratio measure. **a** Same as Fig 2b, but data are plotted using the sag ratio measure. L5 pyramidal cells had significantly larger sag ratio than L2&3 pyramidal cells ( $p < 0.0001$  between L2&3 and L5; One-Way ANOVA post hoc with Dunn's multiple comparison test. L2&3:  $0.07 \pm 0.04$  mV,  $n = 55$ ; L3c:  $0.08 \pm 0.01$  mV,  $n = 15$ ; L5:  $0.11 \pm 0.05$  mV,  $n = 103$ ). Data presented as mean  $\pm$  SD. **b** Same as Fig 2e, showing bath application of Ih blocker ZD7288 ( $10 \mu\text{M}$ ) reducing sag ratio in pyramidal cells from both layers (L2&3-ZD:  $p = 0.0005$ ,  $n = 13$ ; L3c-ZD:  $p = 0.1250$ ,  $n = 4$ ; L5-ZD:  $p = 0.0020$ ,  $n = 10$ ; Wilcoxon matched-pairs signed rank test). Source data are provided as a Source Data file.



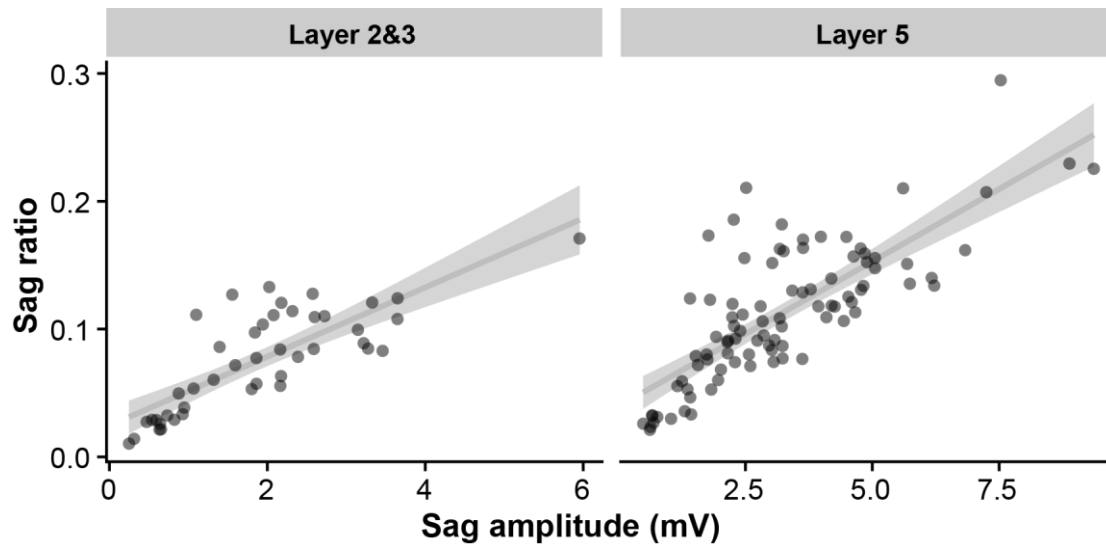

Supplementary Figure 3: Correlation between sag voltage and sag ratio in data from the Krembil Brain Institute cohort. Source data are provided as a Source Data file.

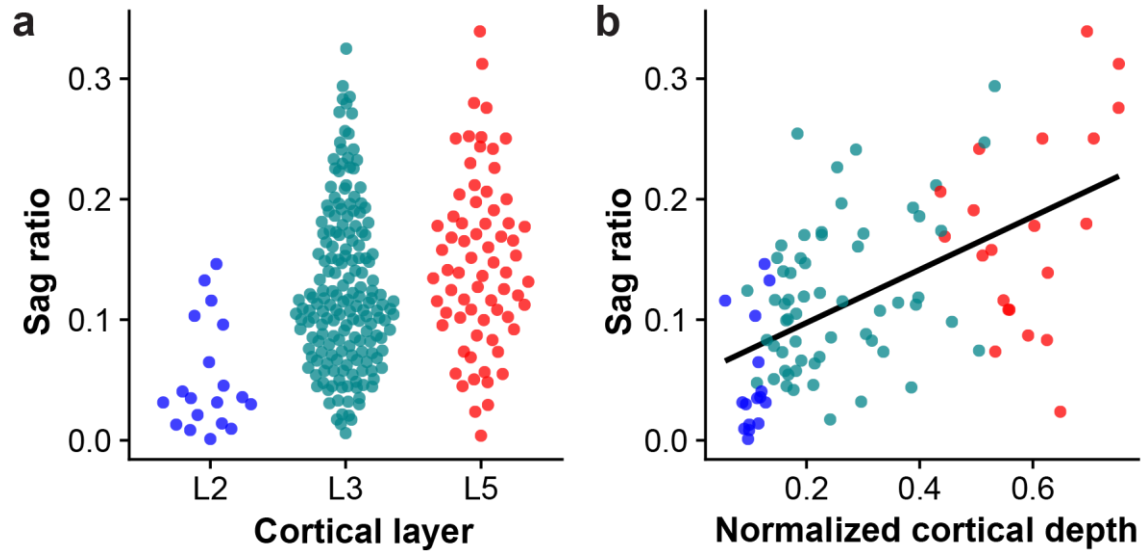

**Supplementary Figure 4: Sag ratio measurements in human cortical pyramidal cells collected from the Allen Institute.** **a** Sag ratio measurement collected in each cortical layer ( $n = 19, 181, 70$  for L2, L3, L5, respectively). **b** Sag ratio as a function of normalized cortical depth from the pial surface ( $n = 16, 59, 21$  for L2, L3, L5, respectively). Cells are a subset of those shown in (a) with normalized cortical depth information available. Line indicates best fit line. Source data are provided as a Source Data file.

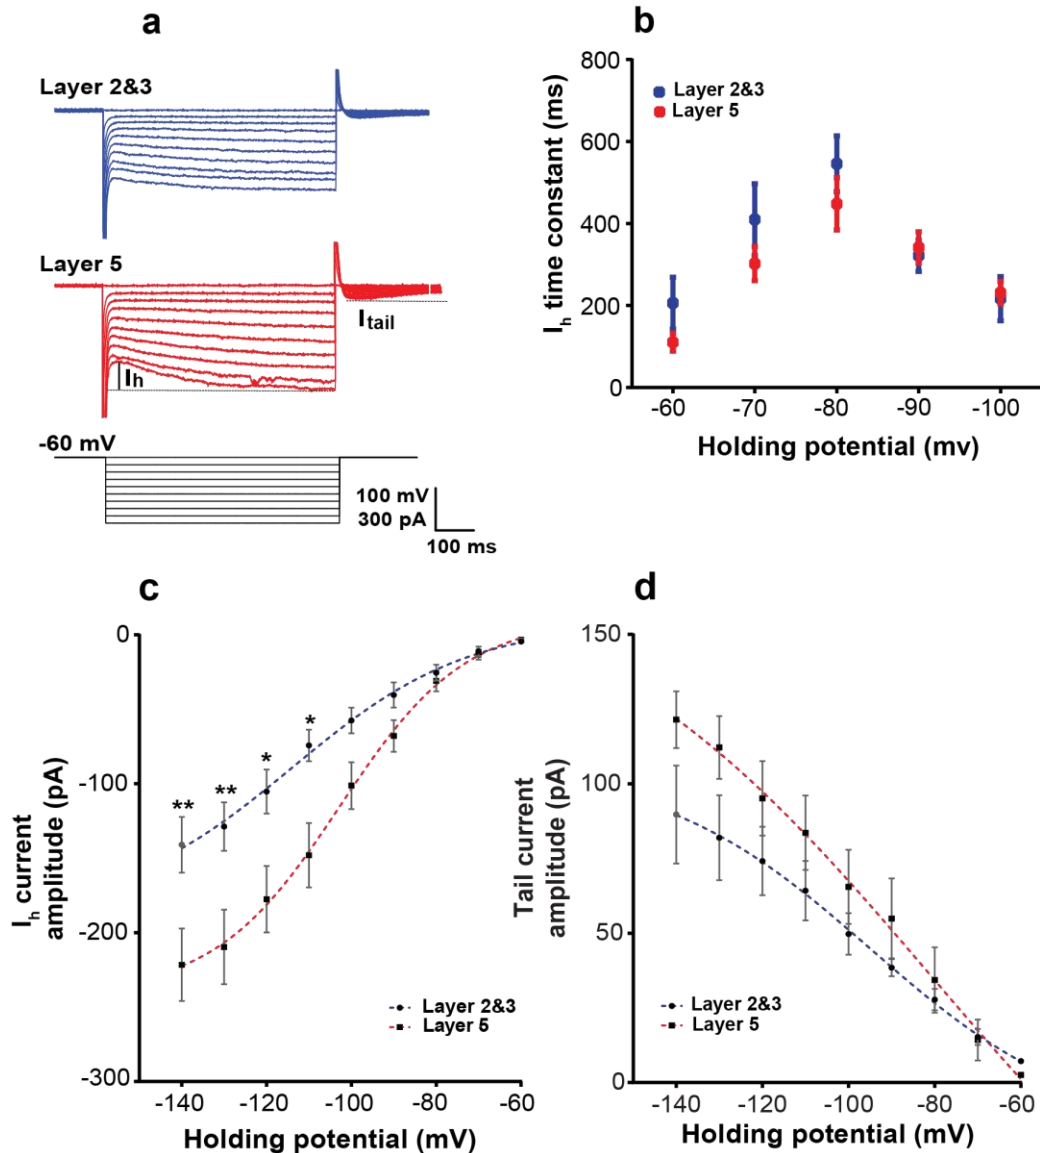

**Supplementary Figure 5: The kinetics of  $I_h$  are similar between L2&3 and L5 pyramidal cells.** **a** Example voltage-clamp recordings of L2&3 and L5 pyramidal cells. Annotations show calculation of  $I_h$  and  $I_{tail}$ . **b** Voltage clamp recordings of current show that  $I_h$  time constants are similar between L2&3 and L5 pyramidal cells ( $p \geq 0.9999$ ; Two-Way ANOVA post hoc with Bonferroni's multiple comparison test, L2&3:  $n=6$ , L5:  $n=10$ ). **c** L5 pyramidal cells had significantly larger  $I_h$  amplitude compared to L2&3 pyramidal cells (\*\* $p=0.0088$ , \*  $p=0.0265$ ; Two-Way ANOVA post hoc with Bonferroni's multiple comparison test). **d** Quantification of  $I_{tail}$  at the end of each holding potential revealed that there was no significant difference between L2&3 and L5 ( $p \geq 0.9999$ ; Two-Way ANOVA post hoc with Bonferroni's multiple comparison test). The dashed lines in **c** and **d** indicates the fit to a Boltzmann function. These data suggest that the difference between sag voltages in L2&3 and L5 pyramidal cells are not due to differences in the kinetics of HCN channels. Data presented as mean  $\pm$  SEM, L2&3:  $n=6$ , L5:  $n=10$ ). Source data are provided as a Source Data file.

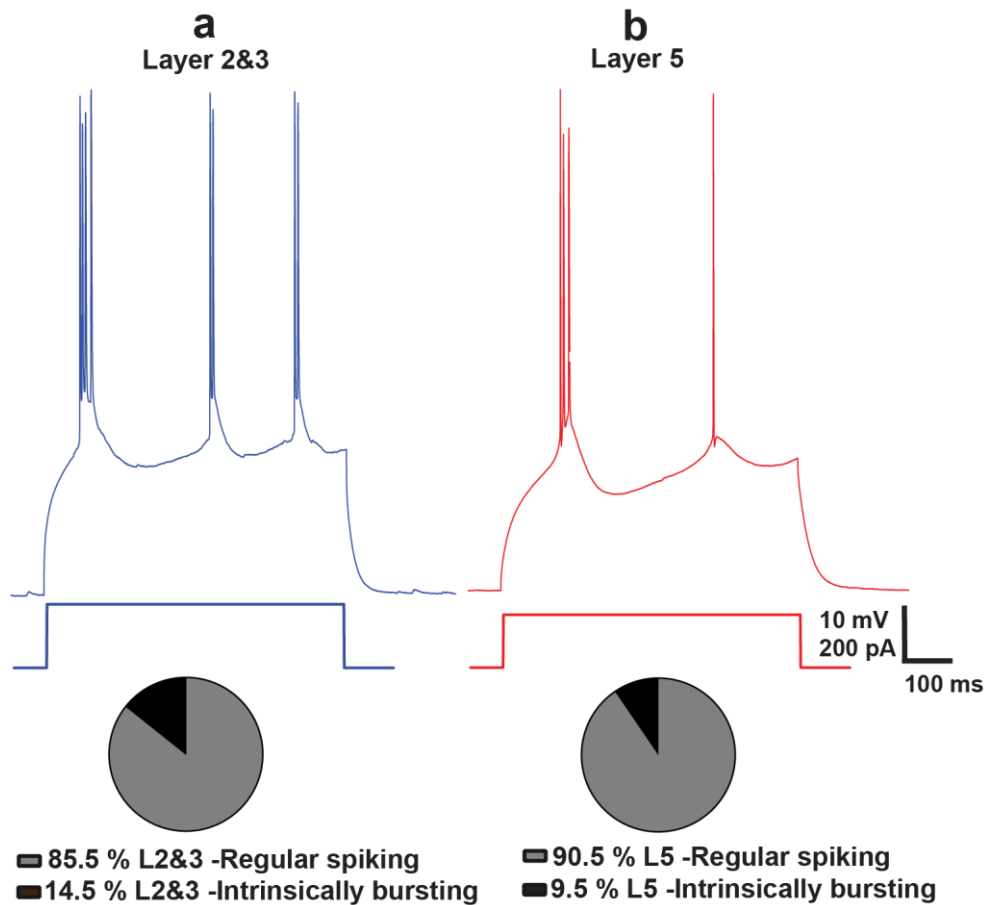

**Supplementary Figure 6: Distribution of different firing patterns across L2&3 and L5 pyramidal cells. a,b** Example voltage traces of intrinsically bursting neurons at rheobase. L2&3 (a) and L5 (b) pyramidal cells tend to have more regular spiking than intrinsically bursting neurons. The percentage of intrinsically bursting neurons recorded in L2&3 was slightly higher than L5. Source data are provided as a Source Data file.

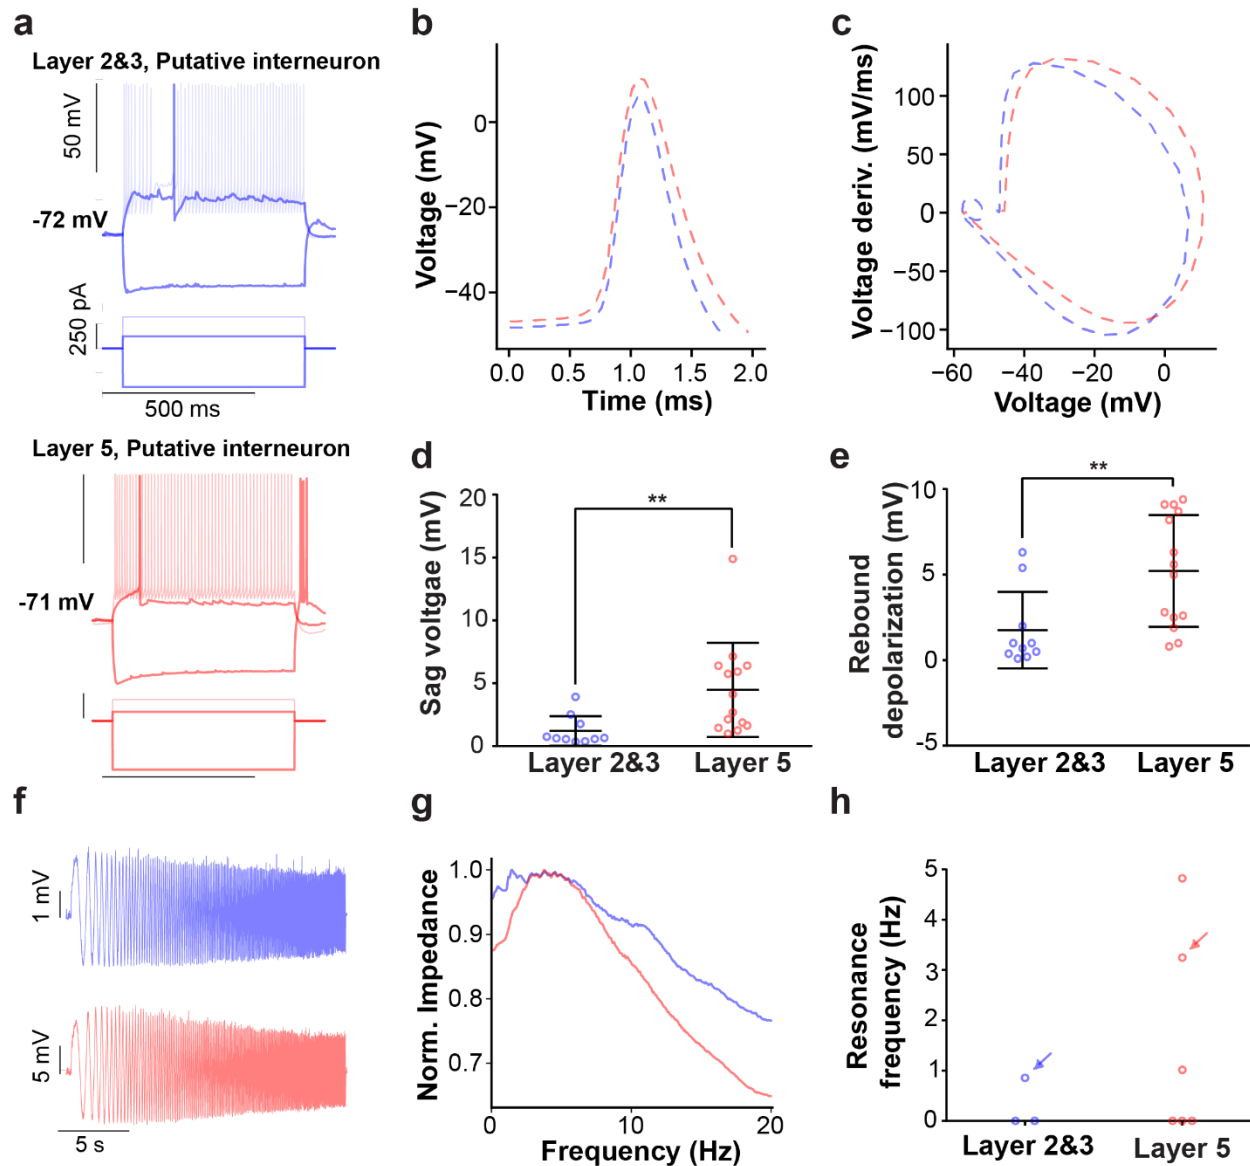

**Supplementary Figure 7. Electrophysiological and subthreshold resonance properties of putative interneurons recorded in L2&3 and L5.** **a** Example voltage responses and current steps for an example putative interneuron from L2&3 (top) and L5 (bottom). **b,c** Action potential waveform (**b**) and action potential phase plot (**c**) averaged over recorded putative interneurons in L2&3 (blue) and L5 (red). **d,e** Sag amplitude ( $p = 0.0012$ ; two-sided t-test, Mann-Whitney, L2&3:  $1.2 \pm 1.1$  mV,  $n=10$ ; L5:  $4.5 \pm 3.7$  mV,  $n=14$ ) (**d**) and post-hyperpolarization rebound depolarization amplitude ( $p = 0.0032$ ; two-sided t-test, Mann-Whitney, L2&3:  $1.7 \pm 2.2$  mV,  $n=10$ ; L5:  $5.2 \pm 3.2$  mV,  $n=14$ ) (**e**) reveals greater amounts of sag and rebound depolarization in L5 putative interneurons compared to L2&3. **f,g** Example subthreshold voltage responses (**f**) and normalized impedance (**g**) following ZAP current injection for example neurons shown in **a**. **h** Subthreshold resonance frequencies show a trend for more subthreshold resonance in L5. Arrows indicate neurons highlighted in **f**. Source data are provided as a Source Data file.

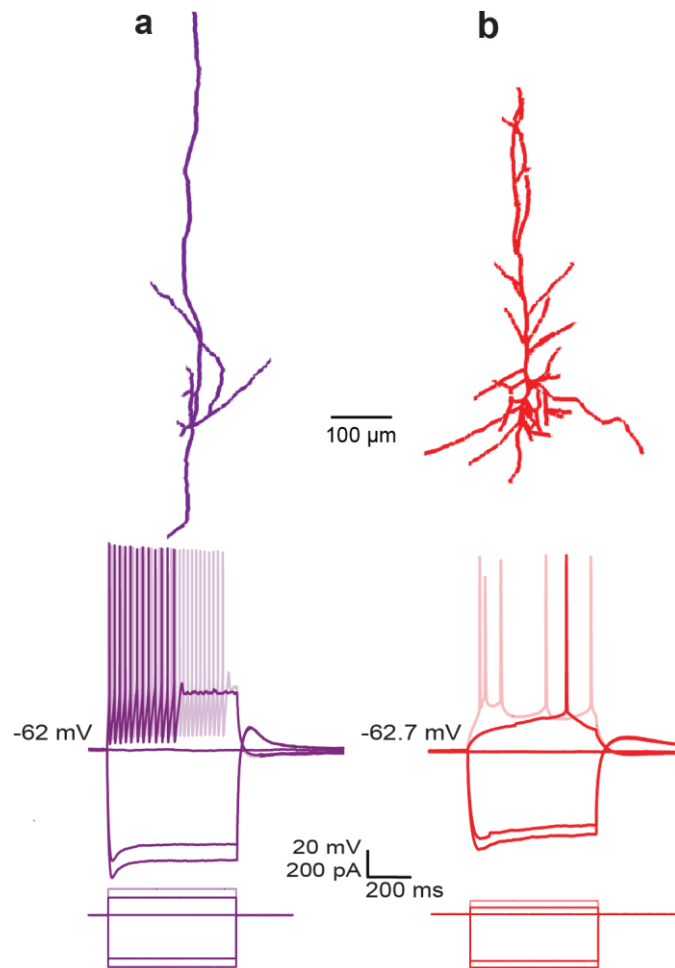

**Supplementary Figure 8: Morphological evidence for interneuron sampling.** **a** Morphological reconstruction and firing pattern following hyperpolarizing and depolarizing current injections for a putative interneuron; 2100  $\mu\text{m}$  below pia. **b** Morphological reconstruction from a confirmed pyramidal cell (cell f in Figure 1) and related firing pattern following hyperpolarizing and depolarizing current injections; 1800  $\mu\text{m}$  below pia.



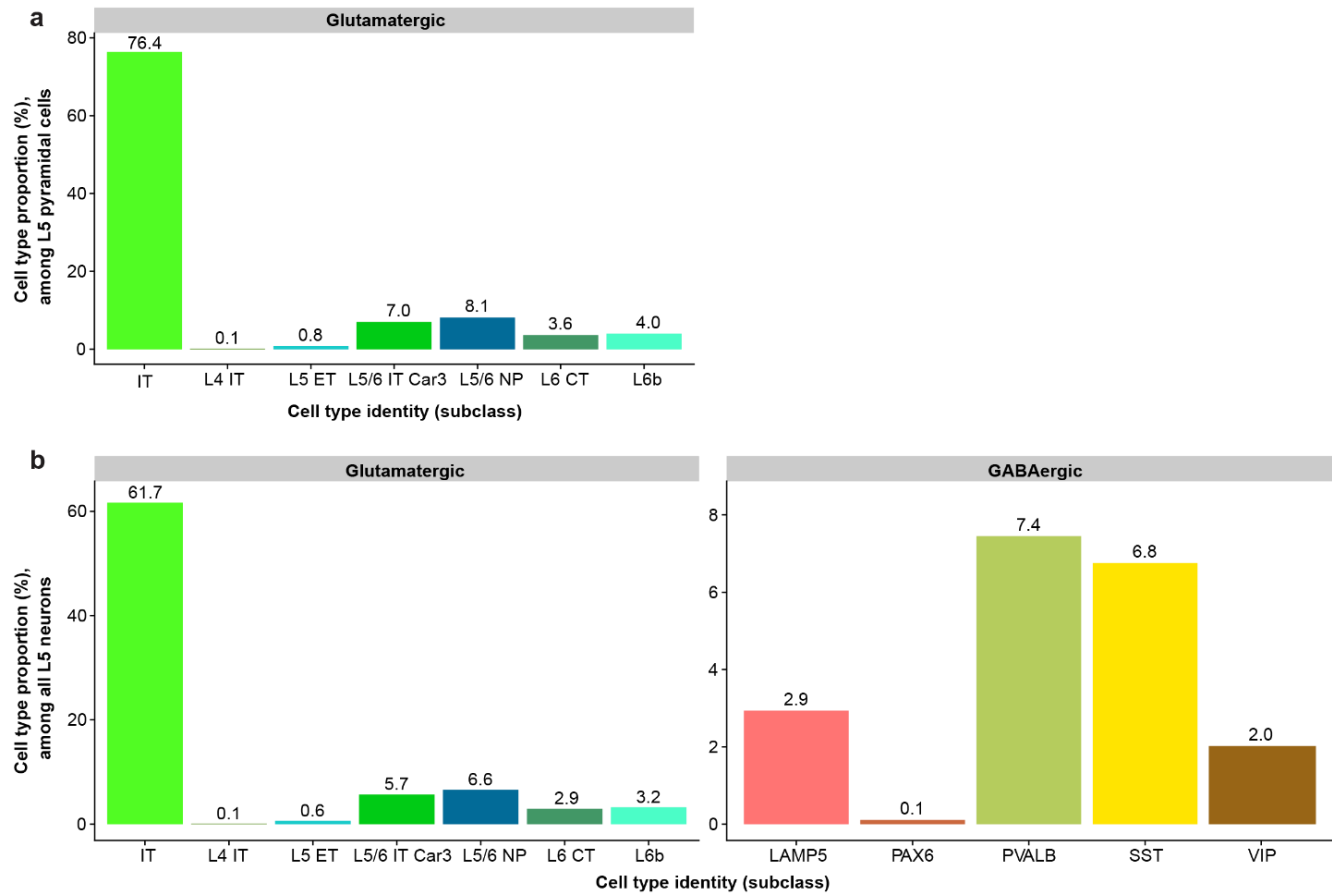

**Supplementary Figure 9: Cell type proportions and in human MTG Layer 5 based on single-nucleus RNAseq reference data.** Data are replotted from Hodge et.al.<sup>1</sup>, based on cortical layer-specific tissue dissections . **a.** Cell type proportions among sampled excitatory (i.e., Glutamatergic) nuclei in L5 (n = 2200 cells total). X-axis denotes cell type labels, annotated to the “subclass” cell type resolution in Hodge et al, 2019. Label “L5 ET” denotes extra-telencephalic projecting cells and “IT” denotes intra-telencephalic projecting cells (identified through transcriptomic similarity and homology to the mouse). **b.** Same as a, but for y-axis denotes cell type proportions relative to all neurons sampled in L5 (n = 2725 cells total). Source data are provided as a Source Data file.

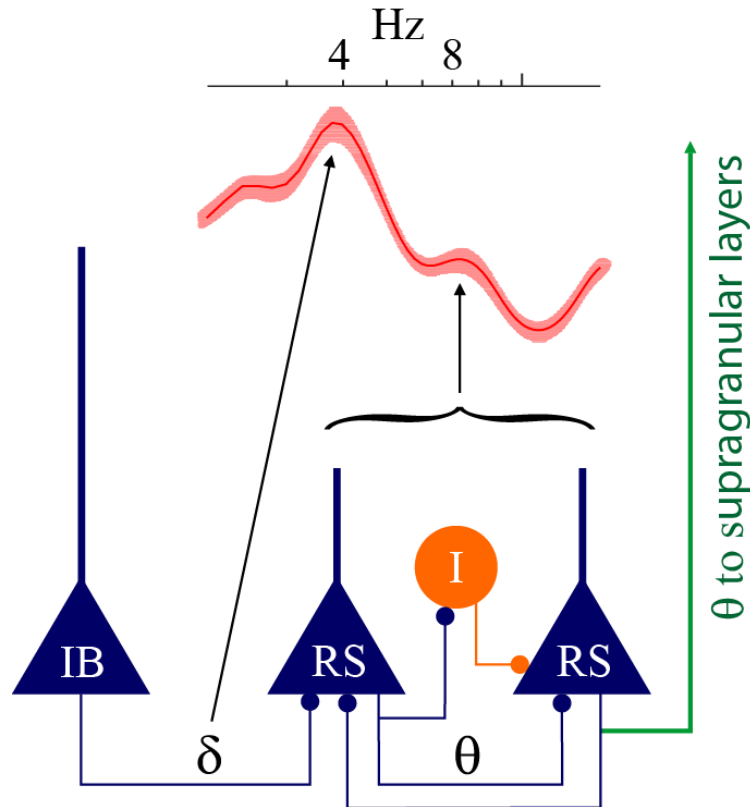

**Supplementary Figure 10: Structural circuit motif for L5 theta oscillations.** Delta frequency output from intrinsically bursting (IB)<sup>2</sup> neurons is well tracked by regular spiking (RS) neurons that have a peak in  $G(f)$  (red) (see Figure 5b in main text) within the delta frequency range. In contrast with IB neurons, RS neurons are poorly adapting, have steep f-I curves, and low rheobase discharge at theta frequency<sup>2</sup>. RS cells drive local circuits at theta frequency range including other RS neurons that track theta well, quantified by the peak at  $\sim 8\text{Hz}$  in  $G(f)$ . Interneurons amplify local activity through rebound excitation (I; orange; see Supplementary Figure 7) in human circuits that are predisposed to reverberant activity<sup>3</sup>.

### Supplementary references

- 1 Hodge, R. D. *et al.* Conserved cell types with divergent features in human versus mouse cortex. *Nature* **573**, 61-68 (2019).
- 2 Carracedo, L. M. *et al.* A neocortical delta rhythm facilitates reciprocal interlaminar interactions via nested theta rhythms. *Journal of Neuroscience* **33**, 10750-10761 (2013).
- 3 Molnár, G. *et al.* Complex events initiated by individual spikes in the human cerebral cortex. *PLoS biology* **6**, e222 (2008).
